# Supplementary material for: Improving Calibration and Validation of Cosmic-Ray NeutronSensors in the Light of Spatial Sensitivity – Theory and Evidence
Source: Copernicus journal article supplement (doi:10.5194/hess-2017-148), 2017-03-27
Supplement: Supplementary file 1 [file CRNS-calibration.xlsx]

## Sheet: Conditions
CRNS Calibration					Average Environmental Conditions
					p=	1013.25	mbar, air pressure					1.00016	footprint scaling
					Hveg=	0	m, tested for vegetation heights up to 2m					1	footprint scaling
					bd=	1.1	g/cm3, bulk density of the soil					0.909091	depth scaling
					h=	10	g/m3, air humidity tested from 0.1 to 50
Radial weighting function for horizontal averaging					SM=	0.02	m3/m3, soil moisture, tested from 0.02 to 0.50
in accordance to eq 4 from Köhli et.al. 2015, WRR
Distance r [m]	Horiz. weight				a00	8735	a01	22.689	a02	11720	a03	0.00978	a04	9306	a05	0.003632
0	0				a10	0.027925	a11	6.6577	a12	0.028544	a13	0.002455	a14	6.851e-05	a15	12.2755
0.1	158228				a20	247970	a21	23.289	a22	374655	a23	0.00191	a24	258552
0.2	250611				a30	0.054818	a31	21.032	a32	0.6373	a33	0.0791	a34	0.0005425
0.3	301071
0.4	325029				A0	18050.9	A1	0.0041658	A2	528094	A3	0.677138
0.5	332415
0.6	329613			formulas	A0 = (a00*(1+a03*x)*exp(-a01*y)+a02*(1+a05*x)-a04*y);
0.7	320717				A1 = ((-a10+a14*x)*exp(-a11*y/(1+a15*y))+a12)*(1+x*a13);
0.8	308341				A2 = (a20*(1+a23*x)*exp(-a21*y)+a22-a24*y);
0.9	294147				A3 = a30*exp(-a31*y)+a32-a33*y+a34*x;
1	279182
1.1	268680				WrA = A0*(exp(-A1*r))+A2*exp(-A3*r)					radial weighting function for 1 ≤ r ≤ 50 m
1.2	252255				Distance r is additionally scaled with air pressure and vegetation height (testing phase under current research)
1.3	236905
1.4	222560				b00	39006	b01	15002337	b02	2009.24	b03	0.01181	b04	3.146	b05	16.7417	b06	3727
1.5	209154				b10	6.031e-05	b11	98.5	b12	0.0013826
1.6	196626				b20	11747	b21	55.033	b22	4521	b23	0.01998	b24	0.00604	b25	33474	b26	0.00475
1.7	184917				b30	0.01543	b31	13.29	b32	0.01807	b33	0.0011	b34	8.81e-05	b35	0.0405	b36	26.74
1.8	173974
1.9	163748				B0	5728.68	B1	0.00657129	B2	17223.1	B3	0.0108273
2	154190
2.1	145258			formulas	B0 = b00*(0.02-1/b05/(x-b05+b06*y))*(b04-y)*exp(-b01*(y-b04))+b02*(0.7-x*y*b03)
2.2	136911				B1 = b10*(x+b11)+b12*y
2.3	129109				B2 = (b20*(1-b26*x)*exp(-b21*y*(1-x*b24))+b22-b25*y)*(2+x*b23)
2.4	121818				B3 = ((-b30+b34*x)*exp(-b31*y/(1+b35*x+b36*y))+b32)*(2+x*b33)
2.5	115004
2.6	108636				WrB = B0*(exp(-B1*r))+B2*exp(-B3*r)					radial weighting function for 50.1 ≤ r ≤ 350 m
2.7	102684				Distance r is additionally scaled with air pressure and vegetation height (testing phase under current research)
2.8	97121.2
2.9	91922.3
3	87063.4
3.1	82522.2
3.2	78277.9
3.3	74311
3.4	70603.4
3.5	67138.1
3.6	63899.3
3.7	60872
3.8	58042.5
3.9	55397.8
4	52925.8
4.1	50615.1
4.2	48455.3
4.3	46436.5
4.4	44549.4
4.5	42785.3
4.6	41136.3
4.7	39594.8
4.8	38153.8
4.9	36806.6
5	35547.2
5.1	34369.8
5.2	33269
5.3	32239.7
5.4	31277.5
5.5	30377.7
5.6	29536.4
5.7	28749.7
5.8	28014
5.9	27326
6	26682.6
6.1	26080.9
6.2	25518.1
6.3	24991.6
6.4	24499.2
6.5	24038.5
6.6	23607.5
6.7	23204.3
6.8	22827
6.9	22473.9
7	22143.5
7.1	21834.2
7.2	21544.7
7.3	21273.7
7.4	21020
7.5	20782.4
7.6	20559.8
7.7	20351.4
7.8	20156.2
7.9	19973.2
8	19801.8
8.1	19641.1
8.2	19490.5
8.3	19349.3
8.4	19216.8
8.5	19092.5
8.6	18975.9
8.7	18866.5
8.8	18763.8
8.9	18667.3
9	18576.6
9.1	18491.5
9.2	18411.4
9.3	18336.1
9.4	18265.3
9.5	18198.6
9.6	18135.8
9.7	18076.7
9.8	18021
9.9	17968.4
10	17918.8
10.1	17872
10.2	17827.8
10.3	17786
10.4	17746.5
10.5	17709.1
10.6	17673.7
10.7	17640.2
10.8	17608.3
10.9	17578.1
11	17549.4
11.1	17522.1
11.2	17496.1
11.3	17471.4
11.4	17447.8
11.5	17425.3
11.6	17403.8
11.7	17383.2
11.8	17363.5
11.9	17344.7
12	17326.6
12.1	17309.2
12.2	17292.5
12.3	17276.5
12.4	17261
12.5	17246
12.6	17231.6
12.7	17217.7
12.8	17204.2
12.9	17191.1
13	17178.4
13.1	17166.1
13.2	17154.2
13.3	17142.5
13.4	17131.2
13.5	17120.1
13.6	17109.3
13.7	17098.7
13.8	17088.4
13.9	17078.3
14	17068.3
14.1	17058.6
14.2	17049.1
14.3	17039.7
14.4	17030.4
14.5	17021.3
14.6	17012.4
14.7	17003.6
14.8	16994.8
14.9	16986.2
15	16977.7
15.1	16969.3
15.2	16961
15.3	16952.8
15.4	16944.6
15.5	16936.6
15.6	16928.6
15.7	16920.6
15.8	16912.8
15.9	16904.9
16	16897.2
16.1	16889.5
16.2	16881.8
16.3	16874.2
16.4	16866.6
16.5	16859
16.6	16851.5
16.7	16844.1
16.8	16836.6
16.9	16829.2
17	16821.8
17.1	16814.5
17.2	16807.2
17.3	16799.9
17.4	16792.6
17.5	16785.3
17.6	16778.1
17.7	16770.9
17.8	16763.7
17.9	16756.5
18	16749.3
18.1	16742.2
18.2	16735
18.3	16727.9
18.4	16720.8
18.5	16713.7
18.6	16706.6
18.7	16699.5
18.8	16692.5
18.9	16685.4
19	16678.4
19.1	16671.3
19.2	16664.3
19.3	16657.3
19.4	16650.3
19.5	16643.3
19.6	16636.3
19.7	16629.3
19.8	16622.3
19.9	16615.3
20	16608.4
20.1	16601.4
20.2	16594.4
20.3	16587.5
20.4	16580.5
20.5	16573.6
20.6	16566.7
20.7	16559.7
20.8	16552.8
20.9	16545.9
21	16539
21.1	16532.1
21.2	16525.2
21.3	16518.3
21.4	16511.4
21.5	16504.5
21.6	16497.6
21.7	16490.7
21.8	16483.8
21.9	16476.9
22	16470
22.1	16463.2
22.2	16456.3
22.3	16449.4
22.4	16442.6
22.5	16435.7
22.6	16428.9
22.7	16422
22.8	16415.2
22.9	16408.3
23	16401.5
23.1	16394.6
23.2	16387.8
23.3	16381
23.4	16374.1
23.5	16367.3
23.6	16360.5
23.7	16353.7
23.8	16346.9
23.9	16340
24	16333.2
24.1	16326.4
24.2	16319.6
24.3	16312.8
24.4	16306
24.5	16299.2
24.6	16292.4
24.7	16285.6
24.8	16278.9
24.9	16272.1
25	16265.3
25.1	16258.5
25.2	16251.7
25.3	16245
25.4	16238.2
25.5	16231.4
25.6	16224.7
25.7	16217.9
25.8	16211.2
25.9	16204.4
26	16197.7
26.1	16190.9
26.2	16184.2
26.3	16177.4
26.4	16170.7
26.5	16163.9
26.6	16157.2
26.7	16150.5
26.8	16143.8
26.9	16137
27	16130.3
27.1	16123.6
27.2	16116.9
27.3	16110.2
27.4	16103.4
27.5	16096.7
27.6	16090
27.7	16083.3
27.8	16076.6
27.9	16069.9
28	16063.2
28.1	16056.5
28.2	16049.9
28.3	16043.2
28.4	16036.5
28.5	16029.8
28.6	16023.1
28.7	16016.5
28.8	16009.8
28.9	16003.1
29	15996.4
29.1	15989.8
29.2	15983.1
29.3	15976.5
29.4	15969.8
29.5	15963.2
29.6	15956.5
29.7	15949.9
29.8	15943.2
29.9	15936.6
30	15929.9
30.1	15923.3
30.2	15916.7
30.3	15910
30.4	15903.4
30.5	15896.8
30.6	15890.2
30.7	15883.5
30.8	15876.9
30.9	15870.3
31	15863.7
31.1	15857.1
31.2	15850.5
31.3	15843.9
31.4	15837.3
31.5	15830.7
31.6	15824.1
31.7	15817.5
31.8	15810.9
31.9	15804.3
32	15797.7
32.1	15791.2
32.2	15784.6
32.3	15778
32.4	15771.4
32.5	15764.9
32.6	15758.3
32.7	15751.7
32.8	15745.2
32.9	15738.6
33	15732.1
33.1	15725.5
33.2	15719
33.3	15712.4
33.4	15705.9
33.5	15699.3
33.6	15692.8
33.7	15686.2
33.8	15679.7
33.9	15673.2
34	15666.7
34.1	15660.1
34.2	15653.6
34.3	15647.1
34.4	15640.6
34.5	15634
34.6	15627.5
34.7	15621
34.8	15614.5
34.9	15608
35	15601.5
35.1	15595
35.2	15588.5
35.3	15582
35.4	15575.5
35.5	15569
35.6	15562.6
35.7	15556.1
35.8	15549.6
35.9	15543.1
36	15536.6
36.1	15530.2
36.2	15523.7
36.3	15517.2
36.4	15510.8
36.5	15504.3
36.6	15497.9
36.7	15491.4
36.8	15484.9
36.9	15478.5
37	15472
37.1	15465.6
37.2	15459.2
37.3	15452.7
37.4	15446.3
37.5	15439.8
37.6	15433.4
37.7	15427
37.8	15420.6
37.9	15414.1
38	15407.7
38.1	15401.3
38.2	15394.9
38.3	15388.5
38.4	15382.1
38.5	15375.7
38.6	15369.2
38.7	15362.8
38.8	15356.4
38.9	15350
39	15343.7
39.1	15337.3
39.2	15330.9
39.3	15324.5
39.4	15318.1
39.5	15311.7
39.6	15305.3
39.7	15299
39.8	15292.6
39.9	15286.2
40	15279.9
40.1	15273.5
40.2	15267.1
40.3	15260.8
40.4	15254.4
40.5	15248.1
40.6	15241.7
40.7	15235.4
40.8	15229
40.9	15222.7
41	15216.3
41.1	15210
41.2	15203.7
41.3	15197.3
41.4	15191
41.5	15184.7
41.6	15178.3
41.7	15172
41.8	15165.7
41.9	15159.4
42	15153.1
42.1	15146.7
42.2	15140.4
42.3	15134.1
42.4	15127.8
42.5	15121.5
42.6	15115.2
42.7	15108.9
42.8	15102.6
42.9	15096.3
43	15090.1
43.1	15083.8
43.2	15077.5
43.3	15071.2
43.4	15064.9
43.5	15058.7
43.6	15052.4
43.7	15046.1
43.8	15039.8
43.9	15033.6
44	15027.3
44.1	15021.1
44.2	15014.8
44.3	15008.5
44.4	15002.3
44.5	14996
44.6	14989.8
44.7	14983.6
44.8	14977.3
44.9	14971.1
45	14964.8
45.1	14958.6
45.2	14952.4
45.3	14946.1
45.4	14939.9
45.5	14933.7
45.6	14927.5
45.7	14921.3
45.8	14915
45.9	14908.8
46	14902.6
46.1	14896.4
46.2	14890.2
46.3	14884
46.4	14877.8
46.5	14871.6
46.6	14865.4
46.7	14859.2
46.8	14853
46.9	14846.8
47	14840.7
47.1	14834.5
47.2	14828.3
47.3	14822.1
47.4	14815.9
47.5	14809.8
47.6	14803.6
47.7	14797.4
47.8	14791.3
47.9	14785.1
48	14778.9
48.1	14772.8
48.2	14766.6
48.3	14760.5
48.4	14754.3
48.5	14748.2
48.6	14742
48.7	14735.9
48.8	14729.8
48.9	14723.6
49	14717.5
49.1	14711.4
49.2	14705.2
49.3	14699.1
49.4	14693
49.5	14686.9
49.6	14680.8
49.7	14674.6
49.8	14668.5
49.9	14662.4
50	14656.3
50.1	14650.2
50.2	14644.1
50.3	14638
50.4	14631.9
50.5	14625.8
50.6	14619.7
50.7	14613.6
50.8	14607.5
50.9	14601.5
51	14595.4
51.1	13998
51.2	13984.6
51.3	13971.2
51.4	13957.8
51.5	13944.5
51.6	13931.1
51.7	13917.8
51.8	13904.4
51.9	13891.1
52	13877.8
52.1	13864.5
52.2	13851.2
52.3	13838
52.4	13824.7
52.5	13811.5
52.6	13798.3
52.7	13785.1
52.8	13771.9
52.9	13758.7
53	13745.5
53.1	13732.4
53.2	13719.2
53.3	13706.1
53.4	13693
53.5	13679.9
53.6	13666.8
53.7	13653.7
53.8	13640.6
53.9	13627.6
54	13614.5
54.1	13601.5
54.2	13588.5
54.3	13575.5
54.4	13562.5
54.5	13549.5
54.6	13536.6
54.7	13523.6
54.8	13510.7
54.9	13497.8
55	13484.8
55.1	13471.9
55.2	13459.1
55.3	13446.2
55.4	13433.3
55.5	13420.5
55.6	13407.7
55.7	13394.8
55.8	13382
55.9	13369.2
56	13356.4
56.1	13343.7
56.2	13330.9
56.3	13318.2
56.4	13305.4
56.5	13292.7
56.6	13280
56.7	13267.3
56.8	13254.6
56.9	13242
57	13229.3
57.1	13216.7
57.2	13204
57.3	13191.4
57.4	13178.8
57.5	13166.2
57.6	13153.6
57.7	13141.1
57.8	13128.5
57.9	13116
58	13103.5
58.1	13090.9
58.2	13078.4
58.3	13065.9
58.4	13053.5
58.5	13041
58.6	13028.5
58.7	13016.1
58.8	13003.7
58.9	12991.2
59	12978.8
59.1	12966.4
59.2	12954.1
59.3	12941.7
59.4	12929.3
59.5	12917
59.6	12904.7
59.7	12892.3
59.8	12880
59.9	12867.7
60	12855.4
60.1	12843.2
60.2	12830.9
60.3	12818.7
60.4	12806.4
60.5	12794.2
60.6	12782
60.7	12769.8
60.8	12757.6
60.9	12745.4
61	12733.3
61.1	12721.1
61.2	12709
61.3	12696.9
61.4	12684.8
61.5	12672.7
61.6	12660.6
61.7	12648.5
61.8	12636.4
61.9	12624.4
62	12612.3
62.1	12600.3
62.2	12588.3
62.3	12576.3
62.4	12564.3
62.5	12552.3
62.6	12540.3
62.7	12528.4
62.8	12516.4
62.9	12504.5
63	12492.6
63.1	12480.7
63.2	12468.8
63.3	12456.9
63.4	12445
63.5	12433.1
63.6	12421.3
63.7	12409.4
63.8	12397.6
63.9	12385.8
64	12374
64.1	12362.2
64.2	12350.4
64.3	12338.6
64.4	12326.9
64.5	12315.1
64.6	12303.4
64.7	12291.7
64.8	12280
64.9	12268.3
65	12256.6
65.1	12244.9
65.2	12233.3
65.3	12221.6
65.4	12210
65.5	12198.3
65.6	12186.7
65.7	12175.1
65.8	12163.5
65.9	12151.9
66	12140.3
66.1	12128.8
66.2	12117.2
66.3	12105.7
66.4	12094.2
66.5	12082.7
66.6	12071.2
66.7	12059.7
66.8	12048.2
66.9	12036.7
67	12025.3
67.1	12013.8
67.2	12002.4
67.3	11991
67.4	11979.5
67.5	11968.1
67.6	11956.7
67.7	11945.4
67.8	11934
67.9	11922.6
68	11911.3
68.1	11900
68.2	11888.6
68.3	11877.3
68.4	11866
68.5	11854.7
68.6	11843.5
68.7	11832.2
68.8	11820.9
68.9	11809.7
69	11798.5
69.1	11787.3
69.2	11776
69.3	11764.8
69.4	11753.7
69.5	11742.5
69.6	11731.3
69.7	11720.2
69.8	11709
69.9	11697.9
70	11686.8
70.1	11675.6
70.2	11664.5
70.3	11653.5
70.4	11642.4
70.5	11631.3
70.6	11620.3
70.7	11609.2
70.8	11598.2
70.9	11587.2
71	11576.1
71.1	11565.1
71.2	11554.2
71.3	11543.2
71.4	11532.2
71.5	11521.2
71.6	11510.3
71.7	11499.4
71.8	11488.4
71.9	11477.5
72	11466.6
72.1	11455.7
72.2	11444.8
72.3	11434
72.4	11423.1
72.5	11412.3
72.6	11401.4
72.7	11390.6
72.8	11379.8
72.9	11369
73	11358.2
73.1	11347.4
73.2	11336.6
73.3	11325.9
73.4	11315.1
73.5	11304.4
73.6	11293.6
73.7	11282.9
73.8	11272.2
73.9	11261.5
74	11250.8
74.1	11240.1
74.2	11229.5
74.3	11218.8
74.4	11208.2
74.5	11197.5
74.6	11186.9
74.7	11176.3
74.8	11165.7
74.9	11155.1
75	11144.5
75.1	11133.9
75.2	11123.4
75.3	11112.8
75.4	11102.3
75.5	11091.7
75.6	11081.2
75.7	11070.7
75.8	11060.2
75.9	11049.7
76	11039.2
76.1	11028.8
76.2	11018.3
76.3	11007.8
76.4	10997.4
76.5	10987
76.6	10976.6
76.7	10966.2
76.8	10955.8
76.9	10945.4
77	10935
77.1	10924.6
77.2	10914.3
77.3	10903.9
77.4	10893.6
77.5	10883.3
77.6	10873
77.7	10862.6
77.8	10852.4
77.9	10842.1
78	10831.8
78.1	10821.5
78.2	10811.3
78.3	10801
78.4	10790.8
78.5	10780.6
78.6	10770.4
78.7	10760.2
78.8	10750
78.9	10739.8
79	10729.6
79.1	10719.4
79.2	10709.3
79.3	10699.1
79.4	10689
79.5	10678.9
79.6	10668.8
79.7	10658.7
79.8	10648.6
79.9	10638.5
80	10628.4
80.1	10618.4
80.2	10608.3
80.3	10598.3
80.4	10588.2
80.5	10578.2
80.6	10568.2
80.7	10558.2
80.8	10548.2
80.9	10538.2
81	10528.2
81.1	10518.3
81.2	10508.3
81.3	10498.4
81.4	10488.4
81.5	10478.5
81.6	10468.6
81.7	10458.7
81.8	10448.8
81.9	10438.9
82	10429
82.1	10419.2
82.2	10409.3
82.3	10399.5
82.4	10389.6
82.5	10379.8
82.6	10370
82.7	10360.2
82.8	10350.4
82.9	10340.6
83	10330.8
83.1	10321
83.2	10311.3
83.3	10301.5
83.4	10291.8
83.5	10282.1
83.6	10272.3
83.7	10262.6
83.8	10252.9
83.9	10243.2
84	10233.6
84.1	10223.9
84.2	10214.2
84.3	10204.6
84.4	10194.9
84.5	10185.3
84.6	10175.7
84.7	10166
84.8	10156.4
84.9	10146.8
85	10137.3
85.1	10127.7
85.2	10118.1
85.3	10108.5
85.4	10099
85.5	10089.5
85.6	10079.9
85.7	10070.4
85.8	10060.9
85.9	10051.4
86	10041.9
86.1	10032.4
86.2	10022.9
86.3	10013.5
86.4	10004
86.5	9994.57
86.6	9985.13
86.7	9975.7
86.8	9966.28
86.9	9956.87
87	9947.47
87.1	9938.08
87.2	9928.7
87.3	9919.33
87.4	9909.97
87.5	9900.61
87.6	9891.27
87.7	9881.93
87.8	9872.61
87.9	9863.29
88	9853.98
88.1	9844.68
88.2	9835.39
88.3	9826.11
88.4	9816.84
88.5	9807.58
88.6	9798.33
88.7	9789.08
88.8	9779.85
88.9	9770.62
89	9761.4
89.1	9752.2
89.2	9743
89.3	9733.81
89.4	9724.63
89.5	9715.46
89.6	9706.3
89.7	9697.14
89.8	9688
89.9	9678.86
90	9669.74
90.1	9660.62
90.2	9651.51
90.3	9642.41
90.4	9633.32
90.5	9624.24
90.6	9615.17
90.7	9606.11
90.8	9597.05
90.9	9588
91	9578.97
91.1	9569.94
91.2	9560.92
91.3	9551.91
91.4	9542.91
91.5	9533.92
91.6	9524.93
91.7	9515.96
91.8	9506.99
91.9	9498.04
92	9489.09
92.1	9480.15
92.2	9471.22
92.3	9462.3
92.4	9453.39
92.5	9444.48
92.6	9435.59
92.7	9426.7
92.8	9417.82
92.9	9408.95
93	9400.09
93.1	9391.24
93.2	9382.4
93.3	9373.56
93.4	9364.74
93.5	9355.92
93.6	9347.11
93.7	9338.31
93.8	9329.52
93.9	9320.74
94	9311.97
94.1	9303.2
94.2	9294.44
94.3	9285.7
94.4	9276.96
94.5	9268.23
94.6	9259.51
94.7	9250.79
94.8	9242.09
94.9	9233.39
95	9224.7
95.1	9216.02
95.2	9207.35
95.3	9198.69
95.4	9190.04
95.5	9181.39
95.6	9172.76
95.7	9164.13
95.8	9155.51
95.9	9146.9
96	9138.3
96.1	9129.7
96.2	9121.12
96.3	9112.54
96.4	9103.97
96.5	9095.41
96.6	9086.86
96.7	9078.31
96.8	9069.78
96.9	9061.25
97	9052.73
97.1	9044.22
97.2	9035.72
97.3	9027.23
97.4	9018.74
97.5	9010.27
97.6	9001.8
97.7	8993.34
97.8	8984.89
97.9	8976.44
98	8968.01
98.1	8959.58
98.2	8951.16
98.3	8942.75
98.4	8934.35
98.5	8925.96
98.6	8917.57
98.7	8909.19
98.8	8900.83
98.9	8892.46
99	8884.11
99.1	8875.77
99.2	8867.43
99.3	8859.1
99.4	8850.78
99.5	8842.47
99.6	8834.17
99.7	8825.87
99.8	8817.59
99.9	8809.31
100	8801.04
100.1	8792.77
100.2	8784.52
100.3	8776.27
100.4	8768.03
100.5	8759.8
100.6	8751.58
100.7	8743.37
100.8	8735.16
100.9	8726.96
101	8718.77
101.1	8710.59
101.2	8702.42
101.3	8694.25
101.4	8686.09
101.5	8677.94
101.6	8669.8
101.7	8661.67
101.8	8653.54
101.9	8645.42
102	8637.31
102.1	8629.21
102.2	8621.12
102.3	8613.03
102.4	8604.95
102.5	8596.88
102.6	8588.82
102.7	8580.77
102.8	8572.72
102.9	8564.68
103	8556.65
103.1	8548.63
103.2	8540.61
103.3	8532.61
103.4	8524.61
103.5	8516.61
103.6	8508.63
103.7	8500.65
103.8	8492.69
103.9	8484.73
104	8476.77
104.1	8468.83
104.2	8460.89
104.3	8452.96
104.4	8445.04
104.5	8437.13
104.6	8429.22
104.7	8421.33
104.8	8413.44
104.9	8405.55
105	8397.68
105.1	8389.81
105.2	8381.95
105.3	8374.1
105.4	8366.26
105.5	8358.42
105.6	8350.59
105.7	8342.77
105.8	8334.96
105.9	8327.15
106	8319.35
106.1	8311.56
106.2	8303.78
106.3	8296.01
106.4	8288.24
106.5	8280.48
106.6	8272.73
106.7	8264.98
106.8	8257.25
106.9	8249.52
107	8241.79
107.1	8234.08
107.2	8226.37
107.3	8218.67
107.4	8210.98
107.5	8203.3
107.6	8195.62
107.7	8187.95
107.8	8180.29
107.9	8172.64
108	8164.99
108.1	8157.35
108.2	8149.72
108.3	8142.1
108.4	8134.48
108.5	8126.87
108.6	8119.27
108.7	8111.67
108.8	8104.09
108.9	8096.51
109	8088.94
109.1	8081.37
109.2	8073.81
109.3	8066.27
109.4	8058.72
109.5	8051.19
109.6	8043.66
109.7	8036.14
109.8	8028.63
109.9	8021.12
110	8013.62
110.1	8006.13
110.2	7998.65
110.3	7991.17
110.4	7983.7
110.5	7976.24
110.6	7968.79
110.7	7961.34
110.8	7953.9
110.9	7946.47
111	7939.04
111.1	7931.63
111.2	7924.22
111.3	7916.81
111.4	7909.42
111.5	7902.03
111.6	7894.65
111.7	7887.27
111.8	7879.9
111.9	7872.54
112	7865.19
112.1	7857.84
112.2	7850.51
112.3	7843.18
112.4	7835.85
112.5	7828.53
112.6	7821.22
112.7	7813.92
112.8	7806.63
112.9	7799.34
113	7792.06
113.1	7784.78
113.2	7777.52
113.3	7770.26
113.4	7763
113.5	7755.76
113.6	7748.52
113.7	7741.29
113.8	7734.06
113.9	7726.84
114	7719.63
114.1	7712.43
114.2	7705.23
114.3	7698.05
114.4	7690.86
114.5	7683.69
114.6	7676.52
114.7	7669.36
114.8	7662.2
114.9	7655.06
115	7647.92
115.1	7640.78
115.2	7633.66
115.3	7626.54
115.4	7619.43
115.5	7612.32
115.6	7605.22
115.7	7598.13
115.8	7591.05
115.9	7583.97
116	7576.9
116.1	7569.83
116.2	7562.78
116.3	7555.73
116.4	7548.68
116.5	7541.65
116.6	7534.62
116.7	7527.59
116.8	7520.58
116.9	7513.57
117	7506.57
117.1	7499.57
117.2	7492.58
117.3	7485.6
117.4	7478.63
117.5	7471.66
117.6	7464.7
117.7	7457.74
117.8	7450.8
117.9	7443.86
118	7436.92
118.1	7429.99
118.2	7423.07
118.3	7416.16
118.4	7409.25
118.5	7402.35
118.6	7395.46
118.7	7388.57
118.8	7381.69
118.9	7374.82
119	7367.95
119.1	7361.09
119.2	7354.24
119.3	7347.39
119.4	7340.55
119.5	7333.72
119.6	7326.89
119.7	7320.07
119.8	7313.26
119.9	7306.45
120	7299.65
120.1	7292.86
120.2	7286.07
120.3	7279.29
120.4	7272.52
120.5	7265.75
120.6	7258.99
120.7	7252.24
120.8	7245.49
120.9	7238.75
121	7232.02
121.1	7225.29
121.2	7218.57
121.3	7211.86
121.4	7205.15
121.5	7198.45
121.6	7191.75
121.7	7185.06
121.8	7178.38
121.9	7171.71
122	7165.04
122.1	7158.38
122.2	7151.72
122.3	7145.07
122.4	7138.43
122.5	7131.79
122.6	7125.16
122.7	7118.54
122.8	7111.92
122.9	7105.31
123	7098.71
123.1	7092.11
123.2	7085.52
123.3	7078.94
123.4	7072.36
123.5	7065.79
123.6	7059.22
123.7	7052.66
123.8	7046.11
123.9	7039.56
124	7033.02
124.1	7026.49
124.2	7019.96
124.3	7013.44
124.4	7006.93
124.5	7000.42
124.6	6993.92
124.7	6987.42
124.8	6980.93
124.9	6974.45
125	6967.97
125.1	6961.5
125.2	6955.04
125.3	6948.58
125.4	6942.13
125.5	6935.69
125.6	6929.25
125.7	6922.82
125.8	6916.39
125.9	6909.97
126	6903.56
126.1	6897.15
126.2	6890.75
126.3	6884.35
126.4	6877.96
126.5	6871.58
126.6	6865.2
126.7	6858.83
126.8	6852.47
126.9	6846.11
127	6839.76
127.1	6833.42
127.2	6827.08
127.3	6820.74
127.4	6814.42
127.5	6808.1
127.6	6801.78
127.7	6795.47
127.8	6789.17
127.9	6782.87
128	6776.58
128.1	6770.3
128.2	6764.02
128.3	6757.75
128.4	6751.49
128.5	6745.23
128.6	6738.97
128.7	6732.73
128.8	6726.48
128.9	6720.25
129	6714.02
129.1	6707.8
129.2	6701.58
129.3	6695.37
129.4	6689.16
129.5	6682.96
129.6	6676.77
129.7	6670.58
129.8	6664.4
129.9	6658.23
130	6652.06
130.1	6645.9
130.2	6639.74
130.3	6633.59
130.4	6627.44
130.5	6621.31
130.6	6615.17
130.7	6609.05
130.8	6602.92
130.9	6596.81
131	6590.7
131.1	6584.6
131.2	6578.5
131.3	6572.41
131.4	6566.32
131.5	6560.24
131.6	6554.17
131.7	6548.1
131.8	6542.04
131.9	6535.98
132	6529.93
132.1	6523.89
132.2	6517.85
132.3	6511.82
132.4	6505.79
132.5	6499.77
132.6	6493.76
132.7	6487.75
132.8	6481.74
132.9	6475.75
133	6469.76
133.1	6463.77
133.2	6457.79
133.3	6451.82
133.4	6445.85
133.5	6439.88
133.6	6433.93
133.7	6427.98
133.8	6422.03
133.9	6416.09
134	6410.16
134.1	6404.23
134.2	6398.31
134.3	6392.39
134.4	6386.48
134.5	6380.58
134.6	6374.68
134.7	6368.78
134.8	6362.9
134.9	6357.01
135	6351.14
135.1	6345.27
135.2	6339.4
135.3	6333.54
135.4	6327.69
135.5	6321.84
135.6	6316
135.7	6310.16
135.8	6304.33
135.9	6298.51
136	6292.69
136.1	6286.87
136.2	6281.06
136.3	6275.26
136.4	6269.46
136.5	6263.67
136.6	6257.89
136.7	6252.11
136.8	6246.33
136.9	6240.56
137	6234.8
137.1	6229.04
137.2	6223.29
137.3	6217.54
137.4	6211.8
137.5	6206.07
137.6	6200.34
137.7	6194.61
137.8	6188.89
137.9	6183.18
138	6177.47
138.1	6171.77
138.2	6166.07
138.3	6160.38
138.4	6154.7
138.5	6149.01
138.6	6143.34
138.7	6137.67
138.8	6132.01
138.9	6126.35
139	6120.7
139.1	6115.05
139.2	6109.41
139.3	6103.77
139.4	6098.14
139.5	6092.51
139.6	6086.89
139.7	6081.28
139.8	6075.67
139.9	6070.07
140	6064.47
140.1	6058.88
140.2	6053.29
140.3	6047.71
140.4	6042.13
140.5	6036.56
140.6	6030.99
140.7	6025.43
140.8	6019.88
140.9	6014.33
141	6008.78
141.1	6003.24
141.2	5997.71
141.3	5992.18
141.4	5986.66
141.5	5981.14
141.6	5975.63
141.7	5970.12
141.8	5964.62
141.9	5959.13
142	5953.63
142.1	5948.15
142.2	5942.67
142.3	5937.19
142.4	5931.72
142.5	5926.26
142.6	5920.8
142.7	5915.35
142.8	5909.9
142.9	5904.46
143	5899.02
143.1	5893.58
143.2	5888.16
143.3	5882.73
143.4	5877.32
143.5	5871.91
143.6	5866.5
143.7	5861.1
143.8	5855.7
143.9	5850.31
144	5844.93
144.1	5839.55
144.2	5834.17
144.3	5828.8
144.4	5823.44
144.5	5818.08
144.6	5812.72
144.7	5807.37
144.8	5802.03
144.9	5796.69
145	5791.36
145.1	5786.03
145.2	5780.7
145.3	5775.38
145.4	5770.07
145.5	5764.76
145.6	5759.46
145.7	5754.16
145.8	5748.87
145.9	5743.58
146	5738.3
146.1	5733.02
146.2	5727.75
146.3	5722.48
146.4	5717.22
146.5	5711.96
146.6	5706.71
146.7	5701.47
146.8	5696.22
146.9	5690.99
147	5685.76
147.1	5680.53
147.2	5675.31
147.3	5670.09
147.4	5664.88
147.5	5659.67
147.6	5654.47
147.7	5649.27
147.8	5644.08
147.9	5638.9
148	5633.72
148.1	5628.54
148.2	5623.37
148.3	5618.2
148.4	5613.04
148.5	5607.88
148.6	5602.73
148.7	5597.59
148.8	5592.44
148.9	5587.31
149	5582.18
149.1	5577.05
149.2	5571.93
149.3	5566.81
149.4	5561.7
149.5	5556.59
149.6	5551.49
149.7	5546.39
149.8	5541.3
149.9	5536.21
150	5531.13
150.1	5526.05
150.2	5520.98
150.3	5515.91
150.4	5510.85
150.5	5505.79
150.6	5500.74
150.7	5495.69
150.8	5490.65
150.9	5485.61
151	5480.58
151.1	5475.55
151.2	5470.53
151.3	5465.51
151.4	5460.49
151.5	5455.48
151.6	5450.48
151.7	5445.48
151.8	5440.49
151.9	5435.5
152	5430.51
152.1	5425.53
152.2	5420.55
152.3	5415.58
152.4	5410.62
152.5	5405.66
152.6	5400.7
152.7	5395.75
152.8	5390.8
152.9	5385.86
153	5380.92
153.1	5375.99
153.2	5371.06
153.3	5366.14
153.4	5361.22
153.5	5356.31
153.6	5351.4
153.7	5346.49
153.8	5341.59
153.9	5336.7
154	5331.81
154.1	5326.93
154.2	5322.04
154.3	5317.17
154.4	5312.3
154.5	5307.43
154.6	5302.57
154.7	5297.71
154.8	5292.86
154.9	5288.01
155	5283.17
155.1	5278.33
155.2	5273.5
155.3	5268.67
155.4	5263.84
155.5	5259.02
155.6	5254.21
155.7	5249.4
155.8	5244.59
155.9	5239.79
156	5234.99
156.1	5230.2
156.2	5225.42
156.3	5220.63
156.4	5215.85
156.5	5211.08
156.6	5206.31
156.7	5201.55
156.8	5196.79
156.9	5192.03
157	5187.28
157.1	5182.54
157.2	5177.79
157.3	5173.06
157.4	5168.32
157.5	5163.6
157.6	5158.87
157.7	5154.15
157.8	5149.44
157.9	5144.73
158	5140.03
158.1	5135.33
158.2	5130.63
158.3	5125.94
158.4	5121.25
158.5	5116.57
158.6	5111.89
158.7	5107.22
158.8	5102.55
158.9	5097.88
159	5093.22
159.1	5088.57
159.2	5083.92
159.3	5079.27
159.4	5074.63
159.5	5069.99
159.6	5065.36
159.7	5060.73
159.8	5056.1
159.9	5051.48
160	5046.87
160.1	5042.26
160.2	5037.65
160.3	5033.05
160.4	5028.45
160.5	5023.86
160.6	5019.27
160.7	5014.68
160.8	5010.1
160.9	5005.53
161	5000.96
161.1	4996.39
161.2	4991.83
161.3	4987.27
161.4	4982.71
161.5	4978.16
161.6	4973.62
161.7	4969.08
161.8	4964.54
161.9	4960.01
162	4955.48
162.1	4950.96
162.2	4946.44
162.3	4941.93
162.4	4937.42
162.5	4932.91
162.6	4928.41
162.7	4923.91
162.8	4919.42
162.9	4914.93
163	4910.45
163.1	4905.97
163.2	4901.49
163.3	4897.02
163.4	4892.55
163.5	4888.09
163.6	4883.63
163.7	4879.18
163.8	4874.73
163.9	4870.28
164	4865.84
164.1	4861.4
164.2	4856.97
164.3	4852.54
164.4	4848.11
164.5	4843.69
164.6	4839.28
164.7	4834.87
164.8	4830.46
164.9	4826.06
165	4821.66
165.1	4817.26
165.2	4812.87
165.3	4808.49
165.4	4804.1
165.5	4799.73
165.6	4795.35
165.7	4790.98
165.8	4786.62
165.9	4782.26
166	4777.9
166.1	4773.55
166.2	4769.2
166.3	4764.85
166.4	4760.51
166.5	4756.18
166.6	4751.84
166.7	4747.52
166.8	4743.19
166.9	4738.87
167	4734.56
167.1	4730.25
167.2	4725.94
167.3	4721.64
167.4	4717.34
167.5	4713.04
167.6	4708.75
167.7	4704.46
167.8	4700.18
167.9	4695.9
168	4691.63
168.1	4687.36
168.2	4683.09
168.3	4678.83
168.4	4674.57
168.5	4670.32
168.6	4666.07
168.7	4661.82
168.8	4657.58
168.9	4653.34
169	4649.11
169.1	4644.88
169.2	4640.66
169.3	4636.43
169.4	4632.22
169.5	4628
169.6	4623.79
169.7	4619.59
169.8	4615.39
169.9	4611.19
170	4607
170.1	4602.81
170.2	4598.62
170.3	4594.44
170.4	4590.27
170.5	4586.09
170.6	4581.92
170.7	4577.76
170.8	4573.6
170.9	4569.44
171	4565.29
171.1	4561.14
171.2	4556.99
171.3	4552.85
171.4	4548.71
171.5	4544.58
171.6	4540.45
171.7	4536.33
171.8	4532.2
171.9	4528.09
172	4523.97
172.1	4519.86
172.2	4515.76
172.3	4511.66
172.4	4507.56
172.5	4503.46
172.6	4499.37
172.7	4495.29
172.8	4491.21
172.9	4487.13
173	4483.05
173.1	4478.98
173.2	4474.92
173.3	4470.85
173.4	4466.79
173.5	4462.74
173.6	4458.69
173.7	4454.64
173.8	4450.6
173.9	4446.56
174	4442.52
174.1	4438.49
174.2	4434.46
174.3	4430.44
174.4	4426.42
174.5	4422.4
174.6	4418.39
174.7	4414.38
174.8	4410.38
174.9	4406.37
175	4402.38
175.1	4398.38
175.2	4394.39
175.3	4390.41
175.4	4386.43
175.5	4382.45
175.6	4378.47
175.7	4374.5
175.8	4370.54
175.9	4366.57
176	4362.61
176.1	4358.66
176.2	4354.71
176.3	4350.76
176.4	4346.81
176.5	4342.87
176.6	4338.94
176.7	4335
176.8	4331.08
176.9	4327.15
177	4323.23
177.1	4319.31
177.2	4315.4
177.3	4311.49
177.4	4307.58
177.5	4303.68
177.6	4299.78
177.7	4295.88
177.8	4291.99
177.9	4288.1
178	4284.22
178.1	4280.34
178.2	4276.46
178.3	4272.59
178.4	4268.72
178.5	4264.85
178.6	4260.99
178.7	4257.13
178.8	4253.28
178.9	4249.43
179	4245.58
179.1	4241.73
179.2	4237.89
179.3	4234.06
179.4	4230.23
179.5	4226.4
179.6	4222.57
179.7	4218.75
179.8	4214.93
179.9	4211.12
180	4207.31
180.1	4203.5
180.2	4199.69
180.3	4195.89
180.4	4192.1
180.5	4188.31
180.6	4184.52
180.7	4180.73
180.8	4176.95
180.9	4173.17
181	4169.4
181.1	4165.63
181.2	4161.86
181.3	4158.09
181.4	4154.33
181.5	4150.58
181.6	4146.82
181.7	4143.07
181.8	4139.33
181.9	4135.59
182	4131.85
182.1	4128.11
182.2	4124.38
182.3	4120.65
182.4	4116.93
182.5	4113.21
182.6	4109.49
182.7	4105.77
182.8	4102.06
182.9	4098.36
183	4094.65
183.1	4090.95
183.2	4087.26
183.3	4083.56
183.4	4079.87
183.5	4076.19
183.6	4072.51
183.7	4068.83
183.8	4065.15
183.9	4061.48
184	4057.81
184.1	4054.15
184.2	4050.49
184.3	4046.83
184.4	4043.17
184.5	4039.52
184.6	4035.88
184.7	4032.23
184.8	4028.59
184.9	4024.95
185	4021.32
185.1	4017.69
185.2	4014.06
185.3	4010.44
185.4	4006.82
185.5	4003.2
185.6	3999.59
185.7	3995.98
185.8	3992.38
185.9	3988.77
186	3985.18
186.1	3981.58
186.2	3977.99
186.3	3974.4
186.4	3970.81
186.5	3967.23
186.6	3963.65
186.7	3960.08
186.8	3956.51
186.9	3952.94
187	3949.37
187.1	3945.81
187.2	3942.25
187.3	3938.7
187.4	3935.15
187.5	3931.6
187.6	3928.05
187.7	3924.51
187.8	3920.97
187.9	3917.44
188	3913.91
188.1	3910.38
188.2	3906.85
188.3	3903.33
188.4	3899.82
188.5	3896.3
188.6	3892.79
188.7	3889.28
188.8	3885.78
188.9	3882.28
189	3878.78
189.1	3875.28
189.2	3871.79
189.3	3868.31
189.4	3864.82
189.5	3861.34
189.6	3857.86
189.7	3854.39
189.8	3850.92
189.9	3847.45
190	3843.98
190.1	3840.52
190.2	3837.06
190.3	3833.61
190.4	3830.16
190.5	3826.71
190.6	3823.26
190.7	3819.82
190.8	3816.38
190.9	3812.95
191	3809.52
191.1	3806.09
191.2	3802.66
191.3	3799.24
191.4	3795.82
191.5	3792.4
191.6	3788.99
191.7	3785.58
191.8	3782.18
191.9	3778.77
192	3775.37
192.1	3771.98
192.2	3768.58
192.3	3765.19
192.4	3761.81
192.5	3758.42
192.6	3755.04
192.7	3751.67
192.8	3748.29
192.9	3744.92
193	3741.55
193.1	3738.19
193.2	3734.83
193.3	3731.47
193.4	3728.12
193.5	3724.77
193.6	3721.42
193.7	3718.07
193.8	3714.73
193.9	3711.39
194	3708.06
194.1	3704.72
194.2	3701.39
194.3	3698.07
194.4	3694.74
194.5	3691.42
194.6	3688.11
194.7	3684.79
194.8	3681.48
194.9	3678.18
195	3674.87
195.1	3671.57
195.2	3668.27
195.3	3664.98
195.4	3661.69
195.5	3658.4
195.6	3655.11
195.7	3651.83
195.8	3648.55
195.9	3645.27
196	3642
196.1	3638.73
196.2	3635.47
196.3	3632.2
196.4	3628.94
196.5	3625.68
196.6	3622.43
196.7	3619.18
196.8	3615.93
196.9	3612.68
197	3609.44
197.1	3606.2
197.2	3602.97
197.3	3599.73
197.4	3596.5
197.5	3593.28
197.6	3590.05
197.7	3586.83
197.8	3583.61
197.9	3580.4
198	3577.19
198.1	3573.98
198.2	3570.77
198.3	3567.57
198.4	3564.37
198.5	3561.18
198.6	3557.98
198.7	3554.79
198.8	3551.61
198.9	3548.42
199	3545.24
199.1	3542.06
[truncated: 1,509 more rows]

## Sheet: Profiles
Soil Moisture Samples for each depth (columns) for each profile (rows)
Distance r [m]	Depth [cm]										Profile avg SM	86% Penetration	Profile avg SM		Weights for each sample										Sum
	5	10	15	20	25	30	35	40	45	50	equally weighted	Depth[cm]	depth-weighted		Expand this downwards as you add profiles!
10	0.1	0.22	0.3	0.2	0.1	0	0	0	0	0.05	0.161667	31.4561	0.176808		0.727673	0.529508	0.385308	0.280378	0.204024	0	0	0	0	0.0416257	2.16852
25	0.1	0.1	0.15	0.4	0.45	0.3	0.05	0.1	0.1	0.05	0.18	28.0327	0.173208		0.699964	0.489949	0.342947	0.24005	0.168026	0.117612	0.0823244	0.0576241	0.0403348	0.0282329	2.26706
50	0.4	0.2	0.4	0.02	0.4	0.4	0.5	0.2	0.1	0.05	0.267	20.8905	0.312966		0.619596	0.383899	0.237863	0.147379	0.0913153	0.0565786	0.0350559	0.0217205	0.0134579	0.00833849	1.6152
75	0.5	0.2	0.3	0.2	0.11	0.3	0.5	0.3	0.5	0.1	0.301	18.5671	0.345496		0.583573	0.340557	0.19874	0.115979	0.0676824	0.0394976	0.0230497	0.0134512	0.00784976	0.00458091	1.39496
100	0.5	0.3	0.12	0.4	0.22	0.15	0.05	0.1	0.1	0.05	0.199	21.9977	0.333425		0.634707	0.402852	0.255693	0.16229	0.103007	0.065379	0.0414965	0.0263381	0.0167169	0.0106104	1.71909
200	0.2	0.3	0.3	0.3	0.2	0.15	0.4	0.2	0.1	0.05	0.22	18.542	0.247796		0.583147	0.34006	0.198305	0.115641	0.0674356	0.0393249	0.0229322	0.0133728	0.00779832	0.00454757	1.39256
300	0.1	0.4	0.3	0.2	0.1	0.2	0.3	0.1	0.4	0.05	0.215	17.8836	0.216825		0.571683	0.326822	0.186838	0.106812	0.0610629	0.0349086	0.0199567	0.0114089	0.00652227	0.00372867	1.32974
add more profiles here…

## Sheet: Results
Distance r	Profile avg SM	Horiz. Weight Wr	Horiz. weighted SM		CRNS apparent SM
10	0.176808	17918.8	0.0432483		25.0986	%vol
25	0.173208	16265.3	0.038458		Please update Conditions!G6 with this value
50	0.312966	14146.4	0.0604366		in order to iterate to a stable value
75	0.345496	11144.5	0.0525606
100	0.333425	8801.04	0.040058		Avg Penetration Depth
200	0.247796	3513.59	0.0118851		22.4814	cm
300	0.216825	1466.22	0.00433979
					Footprint Radius
					169.027	m

## Sheet: FootprintRadius
Footprint Radius [m] depending on humidity (columns) and soil moisture (rows). See supplementary dataset 1 of Köhli et al. 2015
sm\h	1	2	3	4	5	6	7	8	9	10	11	12	13	14	15	16	17	18	19	20	21	22	23	24	25	26	27	28	29	30	31	32	33	34	35	36	37	38	39	40	41	42	43	44	45	46	47	48	49
0.01	232	231	230	228	226	224	222	220	217	215	212	210	207	205	202	200	197	195	192	190	187	185	182	180	178	176	173	171	169	167	165	163	161	159	157	155	153	151	150	148	146	144	143	141	139	138	136	135	133
0.02	226	224	222	220	218	216	213	211	209	207	204	202	200	198	196	193	191	189	187	185	183	181	179	177	175	173	171	169	167	165	163	161	160	158	156	154	153	151	149	148	146	145	143	142	140	139	137	136	134
0.03	225	223	220	218	215	213	211	208	206	204	201	199	197	195	193	191	189	187	184	182	180	179	176	175	173	171	169	167	165	164	162	160	159	157	155	154	152	150	149	147	146	144	143	141	140	139	137	136	134
0.04	226	223	220	218	215	213	210	208	205	203	201	198	196	194	192	190	187	185	183	181	179	177	176	174	172	170	168	166	165	163	161	160	158	156	155	153	152	150	148	147	146	144	143	141	140	138	137	136	134
0.05	227	224	221	218	215	213	210	208	205	203	200	198	196	193	191	189	187	185	183	181	179	177	175	173	171	169	168	166	164	162	161	159	157	156	154	153	151	150	148	147	145	144	142	141	140	138	137	136	134
0.06	227	224	221	218	215	213	210	207	205	202	200	197	195	193	191	188	186	184	182	180	178	176	174	172	171	169	167	165	163	162	160	159	157	155	154	152	151	149	148	146	145	143	142	141	139	138	137	135	134
0.07	226	223	220	217	215	212	209	207	204	202	199	197	195	192	190	188	186	184	182	180	177	176	174	172	170	168	166	165	163	161	160	158	156	155	153	152	150	149	147	146	144	143	141	140	139	137	136	135	134
0.08	226	222	220	217	214	211	208	206	203	201	198	196	194	191	189	187	185	183	181	179	177	175	173	171	169	167	166	164	162	160	159	157	155	154	152	151	149	148	146	145	143	142	141	139	138	137	136	134	133
0.09	224	221	218	215	213	210	207	204	202	200	197	195	192	190	188	186	184	182	180	177	176	174	172	170	168	166	165	163	161	159	158	156	155	153	151	150	148	147	146	144	143	141	140	139	137	136	135	134	132
0.1	222	220	217	214	211	208	206	203	201	198	196	193	191	189	187	184	182	180	178	176	174	172	170	169	167	165	163	162	160	158	157	155	153	152	150	149	147	146	145	143	142	140	139	138	136	135	134	133	132
0.11	221	218	215	212	209	207	204	201	199	196	194	192	189	187	185	183	181	179	177	175	173	171	169	167	166	164	162	160	159	157	155	154	152	151	149	148	146	145	143	142	141	139	138	137	136	134	133	132	131
0.12	219	215	213	210	207	204	202	199	197	195	192	190	188	186	183	181	179	177	175	173	171	169	168	166	164	162	161	159	157	156	154	153	151	149	148	147	145	144	142	141	140	138	137	136	134	133	132	131	130
0.13	216	213	210	208	205	202	200	197	195	193	190	188	186	184	182	180	177	175	173	172	170	168	166	164	162	161	159	157	156	154	153	151	150	148	147	145	144	142	141	140	138	137	136	135	133	132	131	130	129
0.14	214	211	208	206	203	200	198	195	193	191	188	186	184	182	180	178	176	174	172	170	168	166	164	163	161	159	157	156	154	153	151	150	148	147	145	144	142	141	140	139	137	136	135	133	132	131	130	129	127
0.15	211	209	206	203	201	198	196	193	191	189	186	184	182	180	178	176	174	172	170	168	166	165	163	161	159	158	156	154	153	151	150	148	147	145	144	142	141	140	139	137	136	135	133	132	131	130	129	127	126
0.16	209	206	204	201	199	196	194	191	189	187	184	182	180	178	176	174	172	170	168	166	165	163	161	159	158	156	154	153	151	150	148	147	145	144	142	141	140	138	137	136	135	133	132	131	130	129	127	126	125
0.17	207	204	201	199	196	194	191	189	187	184	182	180	178	176	174	172	170	168	166	165	163	161	159	158	156	154	153	151	150	148	147	145	144	142	141	140	138	137	136	135	133	132	131	130	128	127	126	125	124
0.18	204	202	199	197	194	192	189	187	185	182	180	178	176	174	172	170	168	166	165	163	161	159	158	156	154	153	151	150	148	147	145	144	142	141	140	138	137	136	134	133	132	131	130	128	127	126	125	124	123
0.19	202	199	197	194	192	189	187	185	183	180	178	176	174	172	170	168	166	165	163	161	159	158	156	154	153	151	150	148	147	145	144	142	141	140	138	137	136	134	133	132	131	129	128	127	126	125	124	123	122
0.2	200	197	195	192	190	187	185	183	181	178	176	174	172	170	168	166	165	163	161	159	158	156	154	153	151	150	148	147	145	144	142	141	140	138	137	136	134	133	132	131	129	128	127	126	125	124	123	122	121
0.21	198	195	193	190	188	185	183	181	179	176	174	172	170	168	167	165	163	161	159	158	156	154	153	151	150	148	147	145	144	142	141	139	138	137	135	134	133	132	130	129	128	127	126	125	124	123	122	120	119
0.22	195	193	190	188	186	183	181	179	177	175	173	170	169	167	165	163	161	159	158	156	154	153	151	150	148	147	145	144	142	141	139	138	137	135	134	133	132	130	129	128	127	126	125	124	123	121	120	119	118
0.23	193	191	188	186	184	181	179	177	175	173	171	169	167	165	163	161	160	158	156	154	153	151	150	148	147	145	144	142	141	139	138	137	135	134	133	132	130	129	128	127	126	125	124	122	121	120	119	118	117
0.24	191	189	186	184	182	180	177	175	173	171	169	167	165	163	162	160	158	156	155	153	151	150	148	147	145	144	142	141	140	138	137	136	134	133	132	130	129	128	127	126	125	124	122	121	120	119	118	117	116
0.25	189	187	185	182	180	178	176	174	172	169	167	166	164	162	160	158	156	155	153	152	150	148	147	145	144	142	141	140	138	137	136	134	133	132	131	129	128	127	126	125	124	123	121	120	119	118	117	116	115
0.26	188	185	183	181	178	176	174	172	170	168	166	164	162	160	159	157	155	153	152	150	149	147	146	144	143	141	140	138	137	136	134	133	132	131	129	128	127	126	125	124	123	122	120	119	118	117	116	115	114
0.27	186	184	181	179	177	175	173	170	168	166	165	163	161	159	157	155	154	152	150	149	147	146	144	143	141	140	139	137	136	135	133	132	131	130	128	127	126	125	124	123	122	121	120	119	118	116	115	115	114
0.28	184	182	180	177	175	173	171	169	167	165	163	161	159	158	156	154	153	151	149	148	146	145	143	142	140	139	138	136	135	134	132	131	130	129	127	126	125	124	123	122	121	120	119	118	117	116	115	114	113
0.29	183	181	178	176	174	172	170	168	166	164	162	160	158	156	155	153	151	150	148	147	145	143	142	141	139	138	136	135	134	133	131	130	129	128	127	125	124	123	122	121	120	119	118	117	116	115	114	113	112
0.3	181	179	177	175	173	170	168	166	164	162	161	159	157	155	154	152	150	149	147	146	144	142	141	140	138	137	136	134	133	132	130	129	128	127	126	125	123	122	121	120	119	118	117	116	115	114	113	112	111
0.31	180	178	176	173	171	169	167	165	163	161	160	158	156	154	152	151	149	148	146	145	143	142	140	139	137	136	135	133	132	131	130	128	127	126	125	124	123	121	120	119	118	117	116	115	114	113	112	111	110
0.32	179	177	174	172	170	168	166	164	162	160	158	157	155	153	152	150	148	147	145	144	142	141	139	138	136	135	134	133	131	130	129	128	126	125	124	123	122	121	120	119	118	117	116	115	114	113	112	111	110
0.33	178	176	173	171	169	167	165	163	161	159	157	156	154	152	151	149	147	146	144	143	141	140	138	137	136	134	133	132	130	129	128	127	126	125	123	122	121	120	119	118	117	116	115	114	113	112	111	110	109
0.34	177	175	172	170	168	166	164	162	160	158	157	155	153	151	150	148	147	145	143	142	140	139	138	136	135	134	132	131	130	129	127	126	125	124	123	122	120	119	118	117	116	115	114	113	112	112	110	110	109
0.35	176	174	172	169	167	165	163	161	159	158	156	154	152	151	149	147	146	144	143	141	140	138	137	136	134	133	132	130	129	128	127	126	124	123	122	121	120	119	118	117	116	115	114	113	112	111	110	109	108
0.36	175	173	171	169	167	165	162	161	159	157	155	153	152	150	148	147	145	144	142	141	139	138	136	135	134	132	131	130	129	127	126	125	124	123	122	120	119	118	117	116	115	114	113	112	111	110	110	109	108
0.37	174	172	170	168	166	164	162	160	158	156	154	153	151	149	148	146	145	143	141	140	139	137	136	134	133	132	130	129	128	127	126	124	123	122	121	120	119	118	117	116	115	114	113	112	111	110	109	108	107
0.38	174	171	169	167	165	163	161	159	157	156	154	152	150	149	147	146	144	142	141	139	138	137	135	134	133	131	130	129	128	126	125	124	123	122	121	120	118	117	116	115	114	113	112	111	110	110	109	108	107
0.39	173	171	169	167	165	163	161	159	157	155	153	152	150	148	147	145	143	142	140	139	138	136	135	133	132	131	130	128	127	126	125	123	122	121	120	119	118	117	116	115	114	113	112	111	110	109	108	107	107
0.4	173	170	168	166	164	162	160	158	156	155	153	151	149	148	146	145	143	142	140	139	137	136	134	133	132	130	129	128	127	126	124	123	122	121	120	119	118	117	116	115	114	113	112	111	110	109	108	107	106
0.41	172	170	168	166	164	162	160	158	156	154	152	151	149	147	146	144	143	141	140	138	137	135	134	133	131	130	129	128	126	125	124	123	122	121	119	118	117	116	115	114	113	112	111	110	109	109	108	107	106
0.42	172	169	167	165	163	161	159	157	156	154	152	150	149	147	145	144	142	141	139	138	136	135	134	132	131	130	128	127	126	125	124	123	121	120	119	118	117	116	115	114	113	112	111	110	109	108	107	107	106
0.43	171	169	167	165	163	161	159	157	155	154	152	150	148	147	145	144	142	141	139	138	136	135	133	132	131	129	128	127	126	125	123	122	121	120	119	118	117	116	115	114	113	112	111	110	109	108	107	106	105
0.44	171	169	167	165	163	161	159	157	155	153	152	150	148	147	145	143	142	140	139	137	136	135	133	132	131	129	128	127	126	124	123	122	121	120	119	118	117	116	115	114	113	112	111	110	109	108	107	106	105
0.45	171	169	167	165	163	161	159	157	155	153	151	150	148	146	145	143	142	140	139	137	136	134	133	132	130	129	128	127	125	124	123	122	121	120	119	118	116	115	114	113	112	111	110	110	109	108	107	106	105
0.46	171	169	167	164	162	160	159	157	155	153	151	149	148	146	145	143	141	140	139	137	136	134	133	132	130	129	128	126	125	124	123	122	121	120	118	117	116	115	114	113	112	111	110	109	108	108	107	106	105
0.47	171	168	166	164	162	160	158	156	155	153	151	149	148	146	145	143	141	140	138	137	136	134	133	131	130	129	128	126	125	124	123	122	120	119	118	117	116	115	114	113	112	111	110	109	108	107	107	106	105
0.48	171	168	166	164	162	160	158	156	155	153	151	149	148	146	144	143	141	140	138	137	135	134	133	131	130	129	128	126	125	124	123	122	120	119	118	117	116	115	114	113	112	111	110	109	108	107	106	106	105
0.49	171	168	166	164	162	160	158	156	155	153	151	149	148	146	144	143	141	140	138	137	135	134	133	131	130	129	127	126	125	124	123	121	120	119	118	117	116	115	114	113	112	111	110	109	108	107	106	106	105
0.5	171	168	166	164	162	160	158	156	155	153	151	149	148	146	144	143	141	140	138	137	135	134	133	131	130	129	127	126	125	124	123	121	120	119	118	117	116	115	114	113	112	111	110	109	108	107	106	105	105
[truncated: 1 more columns]
