# Supplementary material for: Improving Calibration and Validation of Cosmic-Ray NeutronSensors in the Light of Spatial Sensitivity – Theory and Evidence
Source: Copernicus journal article supplement (doi:10.5194/hess-2017-148), 2017-03-27
Supplement: Supplementary file 3 [file CRNS-weighting.xlsx]

## Sheet: Conditions
CRNS Footprint Weighting					Average Environmental Conditions
					p=	1013.25	mbar, air pressure					1.00016	footprint scaling
					Hveg=	0	m, tested for vegetation heights up to 2m					1	footprint scaling
					bd=	1.1	g/cm3, bulk density of the soil					0.909091	depth scaling
					h=	10	g/m3, air humidity tested from 0.1 to 50
Radial weighting function for horizontal averaging					SM=	0.02	m3/m3, soil moisture, tested from 0.02 to 0.50
in accordance to eq 4 from Köhli et.al. 2015, WRR
Distance r [m]	Horiz. weight				a00	8735	a01	22.689	a02	11720	a03	0.00978	a04	9306	a05	0.003632
0	0				a10	0.027925	a11	6.6577	a12	0.028544	a13	0.002455	a14	6.851e-05	a15	12.2755
0.1	158228				a20	247970	a21	23.289	a22	374655	a23	0.00191	a24	258552
0.2	250611				a30	0.054818	a31	21.032	a32	0.6373	a33	0.0791	a34	0.0005425
0.3	301071
0.4	325029				A0	18050.9	A1	0.0041658	A2	528094	A3	0.677138
0.5	332415
0.6	329613			formulas	A0 = (a00*(1+a03*x)*exp(-a01*y)+a02*(1+a05*x)-a04*y);
0.7	320717				A1 = ((-a10+a14*x)*exp(-a11*y/(1+a15*y))+a12)*(1+x*a13);
0.8	308341				A2 = (a20*(1+a23*x)*exp(-a21*y)+a22-a24*y);
0.9	294147				A3 = a30*exp(-a31*y)+a32-a33*y+a34*x;
1	279182
1.1	268680				WrA = A0*(exp(-A1*r))+A2*exp(-A3*r)					radial weighting function for 1 ≤ r ≤ 50 m
1.2	252255				Distance r is additionally scaled with air pressure and vegetation height (testing phase under current research)
1.3	236905
1.4	222560				b00	39006	b01	15002337	b02	2009.24	b03	0.01181	b04	3.146	b05	16.7417	b06	3727
1.5	209154				b10	6.031e-05	b11	98.5	b12	0.0013826
1.6	196626				b20	11747	b21	55.033	b22	4521	b23	0.01998	b24	0.00604	b25	33474	b26	0.00475
1.7	184917				b30	0.01543	b31	13.29	b32	0.01807	b33	0.0011	b34	8.81e-05	b35	0.0405	b36	26.74
1.8	173974
1.9	163748				B0	5728.68	B1	0.00657129	B2	17223.1	B3	0.0108273
2	154190
2.1	145258			formulas	B0 = b00*(0.02-1/b05/(x-b05+b06*y))*(b04-y)*exp(-b01*(y-b04))+b02*(0.7-x*y*b03)
2.2	136911				B1 = b10*(x+b11)+b12*y
2.3	129109				B2 = (b20*(1-b26*x)*exp(-b21*y*(1-x*b24))+b22-b25*y)*(2+x*b23)
2.4	121818				B3 = ((-b30+b34*x)*exp(-b31*y/(1+b35*x+b36*y))+b32)*(2+x*b33)
2.5	115004
2.6	108636				WrB = B0*(exp(-B1*r))+B2*exp(-B3*r)					radial weighting function for 50.1 ≤ r ≤ 350 m
2.7	102684				Distance r is additionally scaled with air pressure and vegetation height (testing phase under current research)
2.8	97121.2
2.9	91922.3
3	87063.4
3.1	82522.2
3.2	78277.9
3.3	74311
3.4	70603.4
3.5	67138.1
3.6	63899.3
3.7	60872
3.8	58042.5
3.9	55397.8
4	52925.8
4.1	50615.1
4.2	48455.3
4.3	46436.5
4.4	44549.4
4.5	42785.3
4.6	41136.3
4.7	39594.8
4.8	38153.8
4.9	36806.6
5	35547.2
5.1	34369.8
5.2	33269
5.3	32239.7
5.4	31277.5
5.5	30377.7
5.6	29536.4
5.7	28749.7
5.8	28014
5.9	27326
6	26682.6
6.1	26080.9
6.2	25518.1
6.3	24991.6
6.4	24499.2
6.5	24038.5
6.6	23607.5
6.7	23204.3
6.8	22827
6.9	22473.9
7	22143.5
7.1	21834.2
7.2	21544.7
7.3	21273.7
7.4	21020
7.5	20782.4
7.6	20559.8
7.7	20351.4
7.8	20156.2
7.9	19973.2
8	19801.8
8.1	19641.1
8.2	19490.5
8.3	19349.3
8.4	19216.8
8.5	19092.5
8.6	18975.9
8.7	18866.5
8.8	18763.8
8.9	18667.3
9	18576.6
9.1	18491.5
9.2	18411.4
9.3	18336.1
9.4	18265.3
9.5	18198.6
9.6	18135.8
9.7	18076.7
9.8	18021
9.9	17968.4
10	17918.8
10.1	17872
10.2	17827.8
10.3	17786
10.4	17746.5
10.5	17709.1
10.6	17673.7
10.7	17640.2
10.8	17608.3
10.9	17578.1
11	17549.4
11.1	17522.1
11.2	17496.1
11.3	17471.4
11.4	17447.8
11.5	17425.3
11.6	17403.8
11.7	17383.2
11.8	17363.5
11.9	17344.7
12	17326.6
12.1	17309.2
12.2	17292.5
12.3	17276.5
12.4	17261
12.5	17246
12.6	17231.6
12.7	17217.7
12.8	17204.2
12.9	17191.1
13	17178.4
13.1	17166.1
13.2	17154.2
13.3	17142.5
13.4	17131.2
13.5	17120.1
13.6	17109.3
13.7	17098.7
13.8	17088.4
13.9	17078.3
14	17068.3
14.1	17058.6
14.2	17049.1
14.3	17039.7
14.4	17030.4
14.5	17021.3
14.6	17012.4
14.7	17003.6
14.8	16994.8
14.9	16986.2
15	16977.7
15.1	16969.3
15.2	16961
15.3	16952.8
15.4	16944.6
15.5	16936.6
15.6	16928.6
15.7	16920.6
15.8	16912.8
15.9	16904.9
16	16897.2
16.1	16889.5
16.2	16881.8
16.3	16874.2
16.4	16866.6
16.5	16859
16.6	16851.5
16.7	16844.1
16.8	16836.6
16.9	16829.2
17	16821.8
17.1	16814.5
17.2	16807.2
17.3	16799.9
17.4	16792.6
17.5	16785.3
17.6	16778.1
17.7	16770.9
17.8	16763.7
17.9	16756.5
18	16749.3
18.1	16742.2
18.2	16735
18.3	16727.9
18.4	16720.8
18.5	16713.7
18.6	16706.6
18.7	16699.5
18.8	16692.5
18.9	16685.4
19	16678.4
19.1	16671.3
19.2	16664.3
19.3	16657.3
19.4	16650.3
19.5	16643.3
19.6	16636.3
19.7	16629.3
19.8	16622.3
19.9	16615.3
20	16608.4
20.1	16601.4
20.2	16594.4
20.3	16587.5
20.4	16580.5
20.5	16573.6
20.6	16566.7
20.7	16559.7
20.8	16552.8
20.9	16545.9
21	16539
21.1	16532.1
21.2	16525.2
21.3	16518.3
21.4	16511.4
21.5	16504.5
21.6	16497.6
21.7	16490.7
21.8	16483.8
21.9	16476.9
22	16470
22.1	16463.2
22.2	16456.3
22.3	16449.4
22.4	16442.6
22.5	16435.7
22.6	16428.9
22.7	16422
22.8	16415.2
22.9	16408.3
23	16401.5
23.1	16394.6
23.2	16387.8
23.3	16381
23.4	16374.1
23.5	16367.3
23.6	16360.5
23.7	16353.7
23.8	16346.9
23.9	16340
24	16333.2
24.1	16326.4
24.2	16319.6
24.3	16312.8
24.4	16306
24.5	16299.2
24.6	16292.4
24.7	16285.6
24.8	16278.9
24.9	16272.1
25	16265.3
25.1	16258.5
25.2	16251.7
25.3	16245
25.4	16238.2
25.5	16231.4
25.6	16224.7
25.7	16217.9
25.8	16211.2
25.9	16204.4
26	16197.7
26.1	16190.9
26.2	16184.2
26.3	16177.4
26.4	16170.7
26.5	16163.9
26.6	16157.2
26.7	16150.5
26.8	16143.8
26.9	16137
27	16130.3
27.1	16123.6
27.2	16116.9
27.3	16110.2
27.4	16103.4
27.5	16096.7
27.6	16090
27.7	16083.3
27.8	16076.6
27.9	16069.9
28	16063.2
28.1	16056.5
28.2	16049.9
28.3	16043.2
28.4	16036.5
28.5	16029.8
28.6	16023.1
28.7	16016.5
28.8	16009.8
28.9	16003.1
29	15996.4
29.1	15989.8
29.2	15983.1
29.3	15976.5
29.4	15969.8
29.5	15963.2
29.6	15956.5
29.7	15949.9
29.8	15943.2
29.9	15936.6
30	15929.9
30.1	15923.3
30.2	15916.7
30.3	15910
30.4	15903.4
30.5	15896.8
30.6	15890.2
30.7	15883.5
30.8	15876.9
30.9	15870.3
31	15863.7
31.1	15857.1
31.2	15850.5
31.3	15843.9
31.4	15837.3
31.5	15830.7
31.6	15824.1
31.7	15817.5
31.8	15810.9
31.9	15804.3
32	15797.7
32.1	15791.2
32.2	15784.6
32.3	15778
32.4	15771.4
32.5	15764.9
32.6	15758.3
32.7	15751.7
32.8	15745.2
32.9	15738.6
33	15732.1
33.1	15725.5
33.2	15719
33.3	15712.4
33.4	15705.9
33.5	15699.3
33.6	15692.8
33.7	15686.2
33.8	15679.7
33.9	15673.2
34	15666.7
34.1	15660.1
34.2	15653.6
34.3	15647.1
34.4	15640.6
34.5	15634
34.6	15627.5
34.7	15621
34.8	15614.5
34.9	15608
35	15601.5
35.1	15595
35.2	15588.5
35.3	15582
35.4	15575.5
35.5	15569
35.6	15562.6
35.7	15556.1
35.8	15549.6
35.9	15543.1
36	15536.6
36.1	15530.2
36.2	15523.7
36.3	15517.2
36.4	15510.8
36.5	15504.3
36.6	15497.9
36.7	15491.4
36.8	15484.9
36.9	15478.5
37	15472
37.1	15465.6
37.2	15459.2
37.3	15452.7
37.4	15446.3
37.5	15439.8
37.6	15433.4
37.7	15427
37.8	15420.6
37.9	15414.1
38	15407.7
38.1	15401.3
38.2	15394.9
38.3	15388.5
38.4	15382.1
38.5	15375.7
38.6	15369.2
38.7	15362.8
38.8	15356.4
38.9	15350
39	15343.7
39.1	15337.3
39.2	15330.9
39.3	15324.5
39.4	15318.1
39.5	15311.7
39.6	15305.3
39.7	15299
39.8	15292.6
39.9	15286.2
40	15279.9
40.1	15273.5
40.2	15267.1
40.3	15260.8
40.4	15254.4
40.5	15248.1
40.6	15241.7
40.7	15235.4
40.8	15229
40.9	15222.7
41	15216.3
41.1	15210
41.2	15203.7
41.3	15197.3
41.4	15191
41.5	15184.7
41.6	15178.3
41.7	15172
41.8	15165.7
41.9	15159.4
42	15153.1
42.1	15146.7
42.2	15140.4
42.3	15134.1
42.4	15127.8
42.5	15121.5
42.6	15115.2
42.7	15108.9
42.8	15102.6
42.9	15096.3
43	15090.1
43.1	15083.8
43.2	15077.5
43.3	15071.2
43.4	15064.9
43.5	15058.7
43.6	15052.4
43.7	15046.1
43.8	15039.8
43.9	15033.6
44	15027.3
44.1	15021.1
44.2	15014.8
44.3	15008.5
44.4	15002.3
44.5	14996
44.6	14989.8
44.7	14983.6
44.8	14977.3
44.9	14971.1
45	14964.8
45.1	14958.6
45.2	14952.4
45.3	14946.1
45.4	14939.9
45.5	14933.7
45.6	14927.5
45.7	14921.3
45.8	14915
45.9	14908.8
46	14902.6
46.1	14896.4
46.2	14890.2
46.3	14884
46.4	14877.8
46.5	14871.6
46.6	14865.4
46.7	14859.2
46.8	14853
46.9	14846.8
47	14840.7
47.1	14834.5
47.2	14828.3
47.3	14822.1
47.4	14815.9
47.5	14809.8
47.6	14803.6
47.7	14797.4
47.8	14791.3
47.9	14785.1
48	14778.9
48.1	14772.8
48.2	14766.6
48.3	14760.5
48.4	14754.3
48.5	14748.2
48.6	14742
48.7	14735.9
48.8	14729.8
48.9	14723.6
49	14717.5
49.1	14711.4
49.2	14705.2
49.3	14699.1
49.4	14693
49.5	14686.9
49.6	14680.8
49.7	14674.6
49.8	14668.5
49.9	14662.4
50	14656.3
50.1	14650.2
50.2	14644.1
50.3	14638
50.4	14631.9
50.5	14625.8
50.6	14619.7
50.7	14613.6
50.8	14607.5
50.9	14601.5
51	14595.4
51.1	13998
51.2	13984.6
51.3	13971.2
51.4	13957.8
51.5	13944.5
51.6	13931.1
51.7	13917.8
51.8	13904.4
51.9	13891.1
52	13877.8
52.1	13864.5
52.2	13851.2
52.3	13838
52.4	13824.7
52.5	13811.5
52.6	13798.3
52.7	13785.1
52.8	13771.9
52.9	13758.7
53	13745.5
53.1	13732.4
53.2	13719.2
53.3	13706.1
53.4	13693
53.5	13679.9
53.6	13666.8
53.7	13653.7
53.8	13640.6
53.9	13627.6
54	13614.5
54.1	13601.5
54.2	13588.5
54.3	13575.5
54.4	13562.5
54.5	13549.5
54.6	13536.6
54.7	13523.6
54.8	13510.7
54.9	13497.8
55	13484.8
55.1	13471.9
55.2	13459.1
55.3	13446.2
55.4	13433.3
55.5	13420.5
55.6	13407.7
55.7	13394.8
55.8	13382
55.9	13369.2
56	13356.4
56.1	13343.7
56.2	13330.9
56.3	13318.2
56.4	13305.4
56.5	13292.7
56.6	13280
56.7	13267.3
56.8	13254.6
56.9	13242
57	13229.3
57.1	13216.7
57.2	13204
57.3	13191.4
57.4	13178.8
57.5	13166.2
57.6	13153.6
57.7	13141.1
57.8	13128.5
57.9	13116
58	13103.5
58.1	13090.9
58.2	13078.4
58.3	13065.9
58.4	13053.5
58.5	13041
58.6	13028.5
58.7	13016.1
58.8	13003.7
58.9	12991.2
59	12978.8
59.1	12966.4
59.2	12954.1
59.3	12941.7
59.4	12929.3
59.5	12917
59.6	12904.7
59.7	12892.3
59.8	12880
59.9	12867.7
60	12855.4
60.1	12843.2
60.2	12830.9
60.3	12818.7
60.4	12806.4
60.5	12794.2
60.6	12782
60.7	12769.8
60.8	12757.6
60.9	12745.4
61	12733.3
61.1	12721.1
61.2	12709
61.3	12696.9
61.4	12684.8
61.5	12672.7
61.6	12660.6
61.7	12648.5
61.8	12636.4
61.9	12624.4
62	12612.3
62.1	12600.3
62.2	12588.3
62.3	12576.3
62.4	12564.3
62.5	12552.3
62.6	12540.3
62.7	12528.4
62.8	12516.4
62.9	12504.5
63	12492.6
63.1	12480.7
63.2	12468.8
63.3	12456.9
63.4	12445
63.5	12433.1
63.6	12421.3
63.7	12409.4
63.8	12397.6
63.9	12385.8
64	12374
64.1	12362.2
64.2	12350.4
64.3	12338.6
64.4	12326.9
64.5	12315.1
64.6	12303.4
64.7	12291.7
64.8	12280
64.9	12268.3
65	12256.6
65.1	12244.9
65.2	12233.3
65.3	12221.6
65.4	12210
65.5	12198.3
65.6	12186.7
65.7	12175.1
65.8	12163.5
65.9	12151.9
66	12140.3
66.1	12128.8
66.2	12117.2
66.3	12105.7
66.4	12094.2
66.5	12082.7
66.6	12071.2
66.7	12059.7
66.8	12048.2
66.9	12036.7
67	12025.3
67.1	12013.8
67.2	12002.4
67.3	11991
67.4	11979.5
67.5	11968.1
67.6	11956.7
67.7	11945.4
67.8	11934
67.9	11922.6
68	11911.3
68.1	11900
68.2	11888.6
68.3	11877.3
68.4	11866
68.5	11854.7
68.6	11843.5
68.7	11832.2
68.8	11820.9
68.9	11809.7
69	11798.5
69.1	11787.3
69.2	11776
69.3	11764.8
69.4	11753.7
69.5	11742.5
69.6	11731.3
69.7	11720.2
69.8	11709
69.9	11697.9
70	11686.8
70.1	11675.6
70.2	11664.5
70.3	11653.5
70.4	11642.4
70.5	11631.3
70.6	11620.3
70.7	11609.2
70.8	11598.2
70.9	11587.2
71	11576.1
71.1	11565.1
71.2	11554.2
71.3	11543.2
71.4	11532.2
71.5	11521.2
71.6	11510.3
71.7	11499.4
71.8	11488.4
71.9	11477.5
72	11466.6
72.1	11455.7
72.2	11444.8
72.3	11434
72.4	11423.1
72.5	11412.3
72.6	11401.4
72.7	11390.6
72.8	11379.8
72.9	11369
73	11358.2
73.1	11347.4
73.2	11336.6
73.3	11325.9
73.4	11315.1
73.5	11304.4
73.6	11293.6
73.7	11282.9
73.8	11272.2
73.9	11261.5
74	11250.8
74.1	11240.1
74.2	11229.5
74.3	11218.8
74.4	11208.2
74.5	11197.5
74.6	11186.9
74.7	11176.3
74.8	11165.7
74.9	11155.1
75	11144.5
75.1	11133.9
75.2	11123.4
75.3	11112.8
75.4	11102.3
75.5	11091.7
75.6	11081.2
75.7	11070.7
75.8	11060.2
75.9	11049.7
76	11039.2
76.1	11028.8
76.2	11018.3
76.3	11007.8
76.4	10997.4
76.5	10987
76.6	10976.6
76.7	10966.2
76.8	10955.8
76.9	10945.4
77	10935
77.1	10924.6
77.2	10914.3
77.3	10903.9
77.4	10893.6
77.5	10883.3
77.6	10873
77.7	10862.6
77.8	10852.4
77.9	10842.1
78	10831.8
78.1	10821.5
78.2	10811.3
78.3	10801
78.4	10790.8
78.5	10780.6
78.6	10770.4
78.7	10760.2
78.8	10750
78.9	10739.8
79	10729.6
79.1	10719.4
79.2	10709.3
79.3	10699.1
79.4	10689
79.5	10678.9
79.6	10668.8
79.7	10658.7
79.8	10648.6
79.9	10638.5
80	10628.4
80.1	10618.4
80.2	10608.3
80.3	10598.3
80.4	10588.2
80.5	10578.2
80.6	10568.2
80.7	10558.2
80.8	10548.2
80.9	10538.2
81	10528.2
81.1	10518.3
81.2	10508.3
81.3	10498.4
81.4	10488.4
81.5	10478.5
81.6	10468.6
81.7	10458.7
81.8	10448.8
81.9	10438.9
82	10429
82.1	10419.2
82.2	10409.3
82.3	10399.5
82.4	10389.6
82.5	10379.8
82.6	10370
82.7	10360.2
82.8	10350.4
82.9	10340.6
83	10330.8
83.1	10321
83.2	10311.3
83.3	10301.5
83.4	10291.8
83.5	10282.1
83.6	10272.3
83.7	10262.6
83.8	10252.9
83.9	10243.2
84	10233.6
84.1	10223.9
84.2	10214.2
84.3	10204.6
84.4	10194.9
84.5	10185.3
84.6	10175.7
84.7	10166
84.8	10156.4
84.9	10146.8
85	10137.3
85.1	10127.7
85.2	10118.1
85.3	10108.5
85.4	10099
85.5	10089.5
85.6	10079.9
85.7	10070.4
85.8	10060.9
85.9	10051.4
86	10041.9
86.1	10032.4
86.2	10022.9
86.3	10013.5
86.4	10004
86.5	9994.57
86.6	9985.13
86.7	9975.7
86.8	9966.28
86.9	9956.87
87	9947.47
87.1	9938.08
87.2	9928.7
87.3	9919.33
87.4	9909.97
87.5	9900.61
87.6	9891.27
87.7	9881.93
87.8	9872.61
87.9	9863.29
88	9853.98
88.1	9844.68
88.2	9835.39
88.3	9826.11
88.4	9816.84
88.5	9807.58
88.6	9798.33
88.7	9789.08
88.8	9779.85
88.9	9770.62
89	9761.4
89.1	9752.2
89.2	9743
89.3	9733.81
89.4	9724.63
89.5	9715.46
89.6	9706.3
89.7	9697.14
89.8	9688
89.9	9678.86
90	9669.74
90.1	9660.62
90.2	9651.51
90.3	9642.41
90.4	9633.32
90.5	9624.24
90.6	9615.17
90.7	9606.11
90.8	9597.05
90.9	9588
91	9578.97
91.1	9569.94
91.2	9560.92
91.3	9551.91
91.4	9542.91
91.5	9533.92
91.6	9524.93
91.7	9515.96
91.8	9506.99
91.9	9498.04
92	9489.09
92.1	9480.15
92.2	9471.22
92.3	9462.3
92.4	9453.39
92.5	9444.48
92.6	9435.59
92.7	9426.7
92.8	9417.82
92.9	9408.95
93	9400.09
93.1	9391.24
93.2	9382.4
93.3	9373.56
93.4	9364.74
93.5	9355.92
93.6	9347.11
93.7	9338.31
93.8	9329.52
93.9	9320.74
94	9311.97
94.1	9303.2
94.2	9294.44
94.3	9285.7
94.4	9276.96
94.5	9268.23
94.6	9259.51
94.7	9250.79
94.8	9242.09
94.9	9233.39
95	9224.7
95.1	9216.02
95.2	9207.35
95.3	9198.69
95.4	9190.04
95.5	9181.39
95.6	9172.76
95.7	9164.13
95.8	9155.51
95.9	9146.9
96	9138.3
96.1	9129.7
96.2	9121.12
96.3	9112.54
96.4	9103.97
96.5	9095.41
96.6	9086.86
96.7	9078.31
96.8	9069.78
96.9	9061.25
97	9052.73
97.1	9044.22
97.2	9035.72
97.3	9027.23
97.4	9018.74
97.5	9010.27
97.6	9001.8
97.7	8993.34
97.8	8984.89
97.9	8976.44
98	8968.01
98.1	8959.58
98.2	8951.16
98.3	8942.75
98.4	8934.35
98.5	8925.96
98.6	8917.57
98.7	8909.19
98.8	8900.83
98.9	8892.46
99	8884.11
99.1	8875.77
99.2	8867.43
99.3	8859.1
99.4	8850.78
99.5	8842.47
99.6	8834.17
99.7	8825.87
99.8	8817.59
99.9	8809.31
100	8801.04
100.1	8792.77
100.2	8784.52
100.3	8776.27
100.4	8768.03
100.5	8759.8
100.6	8751.58
100.7	8743.37
100.8	8735.16
100.9	8726.96
101	8718.77
101.1	8710.59
101.2	8702.42
101.3	8694.25
101.4	8686.09
101.5	8677.94
101.6	8669.8
101.7	8661.67
101.8	8653.54
101.9	8645.42
102	8637.31
102.1	8629.21
102.2	8621.12
102.3	8613.03
102.4	8604.95
102.5	8596.88
102.6	8588.82
102.7	8580.77
102.8	8572.72
102.9	8564.68
103	8556.65
103.1	8548.63
103.2	8540.61
103.3	8532.61
103.4	8524.61
103.5	8516.61
103.6	8508.63
103.7	8500.65
103.8	8492.69
103.9	8484.73
104	8476.77
104.1	8468.83
104.2	8460.89
104.3	8452.96
104.4	8445.04
104.5	8437.13
104.6	8429.22
104.7	8421.33
104.8	8413.44
104.9	8405.55
105	8397.68
105.1	8389.81
105.2	8381.95
105.3	8374.1
105.4	8366.26
105.5	8358.42
105.6	8350.59
105.7	8342.77
105.8	8334.96
105.9	8327.15
106	8319.35
106.1	8311.56
106.2	8303.78
106.3	8296.01
106.4	8288.24
106.5	8280.48
106.6	8272.73
106.7	8264.98
106.8	8257.25
106.9	8249.52
107	8241.79
107.1	8234.08
107.2	8226.37
107.3	8218.67
107.4	8210.98
107.5	8203.3
107.6	8195.62
107.7	8187.95
107.8	8180.29
107.9	8172.64
108	8164.99
108.1	8157.35
108.2	8149.72
108.3	8142.1
108.4	8134.48
108.5	8126.87
108.6	8119.27
108.7	8111.67
108.8	8104.09
108.9	8096.51
109	8088.94
109.1	8081.37
109.2	8073.81
109.3	8066.27
109.4	8058.72
109.5	8051.19
109.6	8043.66
109.7	8036.14
109.8	8028.63
109.9	8021.12
110	8013.62
110.1	8006.13
110.2	7998.65
110.3	7991.17
110.4	7983.7
110.5	7976.24
110.6	7968.79
110.7	7961.34
110.8	7953.9
110.9	7946.47
111	7939.04
111.1	7931.63
111.2	7924.22
111.3	7916.81
111.4	7909.42
111.5	7902.03
111.6	7894.65
111.7	7887.27
111.8	7879.9
111.9	7872.54
112	7865.19
112.1	7857.84
112.2	7850.51
112.3	7843.18
112.4	7835.85
112.5	7828.53
112.6	7821.22
112.7	7813.92
112.8	7806.63
112.9	7799.34
113	7792.06
113.1	7784.78
113.2	7777.52
113.3	7770.26
113.4	7763
113.5	7755.76
113.6	7748.52
113.7	7741.29
113.8	7734.06
113.9	7726.84
114	7719.63
114.1	7712.43
114.2	7705.23
114.3	7698.05
114.4	7690.86
114.5	7683.69
114.6	7676.52
114.7	7669.36
114.8	7662.2
114.9	7655.06
115	7647.92
115.1	7640.78
115.2	7633.66
115.3	7626.54
115.4	7619.43
115.5	7612.32
115.6	7605.22
115.7	7598.13
115.8	7591.05
115.9	7583.97
116	7576.9
116.1	7569.83
116.2	7562.78
116.3	7555.73
116.4	7548.68
116.5	7541.65
116.6	7534.62
116.7	7527.59
116.8	7520.58
116.9	7513.57
117	7506.57
117.1	7499.57
117.2	7492.58
117.3	7485.6
117.4	7478.63
117.5	7471.66
117.6	7464.7
117.7	7457.74
117.8	7450.8
117.9	7443.86
118	7436.92
118.1	7429.99
118.2	7423.07
118.3	7416.16
118.4	7409.25
118.5	7402.35
118.6	7395.46
118.7	7388.57
118.8	7381.69
118.9	7374.82
119	7367.95
119.1	7361.09
119.2	7354.24
119.3	7347.39
119.4	7340.55
119.5	7333.72
119.6	7326.89
119.7	7320.07
119.8	7313.26
119.9	7306.45
120	7299.65
120.1	7292.86
120.2	7286.07
120.3	7279.29
120.4	7272.52
120.5	7265.75
120.6	7258.99
120.7	7252.24
120.8	7245.49
120.9	7238.75
121	7232.02
121.1	7225.29
121.2	7218.57
121.3	7211.86
121.4	7205.15
121.5	7198.45
121.6	7191.75
121.7	7185.06
121.8	7178.38
121.9	7171.71
122	7165.04
122.1	7158.38
122.2	7151.72
122.3	7145.07
122.4	7138.43
122.5	7131.79
122.6	7125.16
122.7	7118.54
122.8	7111.92
122.9	7105.31
123	7098.71
123.1	7092.11
123.2	7085.52
123.3	7078.94
123.4	7072.36
123.5	7065.79
123.6	7059.22
123.7	7052.66
123.8	7046.11
123.9	7039.56
124	7033.02
124.1	7026.49
124.2	7019.96
124.3	7013.44
124.4	7006.93
124.5	7000.42
124.6	6993.92
124.7	6987.42
124.8	6980.93
124.9	6974.45
125	6967.97
125.1	6961.5
125.2	6955.04
125.3	6948.58
125.4	6942.13
125.5	6935.69
125.6	6929.25
125.7	6922.82
125.8	6916.39
125.9	6909.97
126	6903.56
126.1	6897.15
126.2	6890.75
126.3	6884.35
126.4	6877.96
126.5	6871.58
126.6	6865.2
126.7	6858.83
126.8	6852.47
126.9	6846.11
127	6839.76
127.1	6833.42
127.2	6827.08
127.3	6820.74
127.4	6814.42
127.5	6808.1
127.6	6801.78
127.7	6795.47
127.8	6789.17
127.9	6782.87
128	6776.58
128.1	6770.3
128.2	6764.02
128.3	6757.75
128.4	6751.49
128.5	6745.23
128.6	6738.97
128.7	6732.73
128.8	6726.48
128.9	6720.25
129	6714.02
129.1	6707.8
129.2	6701.58
129.3	6695.37
129.4	6689.16
129.5	6682.96
129.6	6676.77
129.7	6670.58
129.8	6664.4
129.9	6658.23
130	6652.06
130.1	6645.9
130.2	6639.74
130.3	6633.59
130.4	6627.44
130.5	6621.31
130.6	6615.17
130.7	6609.05
130.8	6602.92
130.9	6596.81
131	6590.7
131.1	6584.6
131.2	6578.5
131.3	6572.41
131.4	6566.32
131.5	6560.24
131.6	6554.17
131.7	6548.1
131.8	6542.04
131.9	6535.98
132	6529.93
132.1	6523.89
132.2	6517.85
132.3	6511.82
132.4	6505.79
132.5	6499.77
132.6	6493.76
132.7	6487.75
132.8	6481.74
132.9	6475.75
133	6469.76
133.1	6463.77
133.2	6457.79
133.3	6451.82
133.4	6445.85
133.5	6439.88
133.6	6433.93
133.7	6427.98
133.8	6422.03
133.9	6416.09
134	6410.16
134.1	6404.23
134.2	6398.31
134.3	6392.39
134.4	6386.48
134.5	6380.58
134.6	6374.68
134.7	6368.78
134.8	6362.9
134.9	6357.01
135	6351.14
135.1	6345.27
135.2	6339.4
135.3	6333.54
135.4	6327.69
135.5	6321.84
135.6	6316
135.7	6310.16
135.8	6304.33
135.9	6298.51
136	6292.69
136.1	6286.87
136.2	6281.06
136.3	6275.26
136.4	6269.46
136.5	6263.67
136.6	6257.89
136.7	6252.11
136.8	6246.33
136.9	6240.56
137	6234.8
137.1	6229.04
137.2	6223.29
137.3	6217.54
137.4	6211.8
137.5	6206.07
137.6	6200.34
137.7	6194.61
137.8	6188.89
137.9	6183.18
138	6177.47
138.1	6171.77
138.2	6166.07
138.3	6160.38
138.4	6154.7
138.5	6149.01
138.6	6143.34
138.7	6137.67
138.8	6132.01
138.9	6126.35
139	6120.7
139.1	6115.05
139.2	6109.41
139.3	6103.77
139.4	6098.14
139.5	6092.51
139.6	6086.89
139.7	6081.28
139.8	6075.67
139.9	6070.07
140	6064.47
140.1	6058.88
140.2	6053.29
140.3	6047.71
140.4	6042.13
140.5	6036.56
140.6	6030.99
140.7	6025.43
140.8	6019.88
140.9	6014.33
141	6008.78
141.1	6003.24
141.2	5997.71
141.3	5992.18
141.4	5986.66
141.5	5981.14
141.6	5975.63
141.7	5970.12
141.8	5964.62
141.9	5959.13
142	5953.63
142.1	5948.15
142.2	5942.67
142.3	5937.19
142.4	5931.72
142.5	5926.26
142.6	5920.8
142.7	5915.35
142.8	5909.9
142.9	5904.46
143	5899.02
143.1	5893.58
143.2	5888.16
143.3	5882.73
143.4	5877.32
143.5	5871.91
143.6	5866.5
143.7	5861.1
143.8	5855.7
143.9	5850.31
144	5844.93
144.1	5839.55
144.2	5834.17
144.3	5828.8
144.4	5823.44
144.5	5818.08
144.6	5812.72
144.7	5807.37
144.8	5802.03
144.9	5796.69
145	5791.36
145.1	5786.03
145.2	5780.7
145.3	5775.38
145.4	5770.07
145.5	5764.76
145.6	5759.46
145.7	5754.16
145.8	5748.87
145.9	5743.58
146	5738.3
146.1	5733.02
146.2	5727.75
146.3	5722.48
146.4	5717.22
146.5	5711.96
146.6	5706.71
146.7	5701.47
146.8	5696.22
146.9	5690.99
147	5685.76
147.1	5680.53
147.2	5675.31
147.3	5670.09
147.4	5664.88
147.5	5659.67
147.6	5654.47
147.7	5649.27
147.8	5644.08
147.9	5638.9
148	5633.72
148.1	5628.54
148.2	5623.37
148.3	5618.2
148.4	5613.04
148.5	5607.88
148.6	5602.73
148.7	5597.59
148.8	5592.44
148.9	5587.31
149	5582.18
149.1	5577.05
149.2	5571.93
149.3	5566.81
149.4	5561.7
149.5	5556.59
149.6	5551.49
149.7	5546.39
149.8	5541.3
149.9	5536.21
150	5531.13
150.1	5526.05
150.2	5520.98
150.3	5515.91
150.4	5510.85
150.5	5505.79
150.6	5500.74
150.7	5495.69
150.8	5490.65
150.9	5485.61
151	5480.58
151.1	5475.55
151.2	5470.53
151.3	5465.51
151.4	5460.49
151.5	5455.48
151.6	5450.48
151.7	5445.48
151.8	5440.49
151.9	5435.5
152	5430.51
152.1	5425.53
152.2	5420.55
152.3	5415.58
152.4	5410.62
152.5	5405.66
152.6	5400.7
152.7	5395.75
152.8	5390.8
152.9	5385.86
153	5380.92
153.1	5375.99
153.2	5371.06
153.3	5366.14
153.4	5361.22
153.5	5356.31
153.6	5351.4
153.7	5346.49
153.8	5341.59
153.9	5336.7
154	5331.81
154.1	5326.93
154.2	5322.04
154.3	5317.17
154.4	5312.3
154.5	5307.43
154.6	5302.57
154.7	5297.71
154.8	5292.86
154.9	5288.01
155	5283.17
155.1	5278.33
155.2	5273.5
155.3	5268.67
155.4	5263.84
155.5	5259.02
155.6	5254.21
155.7	5249.4
155.8	5244.59
155.9	5239.79
156	5234.99
156.1	5230.2
156.2	5225.42
156.3	5220.63
156.4	5215.85
156.5	5211.08
156.6	5206.31
156.7	5201.55
156.8	5196.79
156.9	5192.03
157	5187.28
157.1	5182.54
157.2	5177.79
157.3	5173.06
157.4	5168.32
157.5	5163.6
157.6	5158.87
157.7	5154.15
157.8	5149.44
157.9	5144.73
158	5140.03
158.1	5135.33
158.2	5130.63
158.3	5125.94
158.4	5121.25
158.5	5116.57
158.6	5111.89
158.7	5107.22
158.8	5102.55
158.9	5097.88
159	5093.22
159.1	5088.57
159.2	5083.92
159.3	5079.27
159.4	5074.63
159.5	5069.99
159.6	5065.36
159.7	5060.73
159.8	5056.1
159.9	5051.48
160	5046.87
160.1	5042.26
160.2	5037.65
160.3	5033.05
160.4	5028.45
160.5	5023.86
160.6	5019.27
160.7	5014.68
160.8	5010.1
160.9	5005.53
161	5000.96
161.1	4996.39
161.2	4991.83
161.3	4987.27
161.4	4982.71
161.5	4978.16
161.6	4973.62
161.7	4969.08
161.8	4964.54
161.9	4960.01
162	4955.48
162.1	4950.96
162.2	4946.44
162.3	4941.93
162.4	4937.42
162.5	4932.91
162.6	4928.41
162.7	4923.91
162.8	4919.42
162.9	4914.93
163	4910.45
163.1	4905.97
163.2	4901.49
163.3	4897.02
163.4	4892.55
163.5	4888.09
163.6	4883.63
163.7	4879.18
163.8	4874.73
163.9	4870.28
164	4865.84
164.1	4861.4
164.2	4856.97
164.3	4852.54
164.4	4848.11
164.5	4843.69
164.6	4839.28
164.7	4834.87
164.8	4830.46
164.9	4826.06
165	4821.66
165.1	4817.26
165.2	4812.87
165.3	4808.49
165.4	4804.1
165.5	4799.73
165.6	4795.35
165.7	4790.98
165.8	4786.62
165.9	4782.26
166	4777.9
166.1	4773.55
166.2	4769.2
166.3	4764.85
166.4	4760.51
166.5	4756.18
166.6	4751.84
166.7	4747.52
166.8	4743.19
166.9	4738.87
167	4734.56
167.1	4730.25
167.2	4725.94
167.3	4721.64
167.4	4717.34
167.5	4713.04
167.6	4708.75
167.7	4704.46
167.8	4700.18
167.9	4695.9
168	4691.63
168.1	4687.36
168.2	4683.09
168.3	4678.83
168.4	4674.57
168.5	4670.32
168.6	4666.07
168.7	4661.82
168.8	4657.58
168.9	4653.34
169	4649.11
169.1	4644.88
169.2	4640.66
169.3	4636.43
169.4	4632.22
169.5	4628
169.6	4623.79
169.7	4619.59
169.8	4615.39
169.9	4611.19
170	4607
170.1	4602.81
170.2	4598.62
170.3	4594.44
170.4	4590.27
170.5	4586.09
170.6	4581.92
170.7	4577.76
170.8	4573.6
170.9	4569.44
171	4565.29
171.1	4561.14
171.2	4556.99
171.3	4552.85
171.4	4548.71
171.5	4544.58
171.6	4540.45
171.7	4536.33
171.8	4532.2
171.9	4528.09
172	4523.97
172.1	4519.86
172.2	4515.76
172.3	4511.66
172.4	4507.56
172.5	4503.46
172.6	4499.37
172.7	4495.29
172.8	4491.21
172.9	4487.13
173	4483.05
173.1	4478.98
173.2	4474.92
173.3	4470.85
173.4	4466.79
173.5	4462.74
173.6	4458.69
173.7	4454.64
173.8	4450.6
173.9	4446.56
174	4442.52
174.1	4438.49
174.2	4434.46
174.3	4430.44
174.4	4426.42
174.5	4422.4
174.6	4418.39
174.7	4414.38
174.8	4410.38
174.9	4406.37
175	4402.38
175.1	4398.38
175.2	4394.39
175.3	4390.41
175.4	4386.43
175.5	4382.45
175.6	4378.47
175.7	4374.5
175.8	4370.54
175.9	4366.57
176	4362.61
176.1	4358.66
176.2	4354.71
176.3	4350.76
176.4	4346.81
176.5	4342.87
176.6	4338.94
176.7	4335
176.8	4331.08
176.9	4327.15
177	4323.23
177.1	4319.31
177.2	4315.4
177.3	4311.49
177.4	4307.58
177.5	4303.68
177.6	4299.78
177.7	4295.88
177.8	4291.99
177.9	4288.1
178	4284.22
178.1	4280.34
178.2	4276.46
178.3	4272.59
178.4	4268.72
178.5	4264.85
178.6	4260.99
178.7	4257.13
178.8	4253.28
178.9	4249.43
179	4245.58
179.1	4241.73
179.2	4237.89
179.3	4234.06
179.4	4230.23
179.5	4226.4
179.6	4222.57
179.7	4218.75
179.8	4214.93
179.9	4211.12
180	4207.31
180.1	4203.5
180.2	4199.69
180.3	4195.89
180.4	4192.1
180.5	4188.31
180.6	4184.52
180.7	4180.73
180.8	4176.95
180.9	4173.17
181	4169.4
181.1	4165.63
181.2	4161.86
181.3	4158.09
181.4	4154.33
181.5	4150.58
181.6	4146.82
181.7	4143.07
181.8	4139.33
181.9	4135.59
182	4131.85
182.1	4128.11
182.2	4124.38
182.3	4120.65
182.4	4116.93
182.5	4113.21
182.6	4109.49
182.7	4105.77
182.8	4102.06
182.9	4098.36
183	4094.65
183.1	4090.95
183.2	4087.26
183.3	4083.56
183.4	4079.87
183.5	4076.19
183.6	4072.51
183.7	4068.83
183.8	4065.15
183.9	4061.48
184	4057.81
184.1	4054.15
184.2	4050.49
184.3	4046.83
184.4	4043.17
184.5	4039.52
184.6	4035.88
184.7	4032.23
184.8	4028.59
184.9	4024.95
185	4021.32
185.1	4017.69
185.2	4014.06
185.3	4010.44
185.4	4006.82
185.5	4003.2
185.6	3999.59
185.7	3995.98
185.8	3992.38
185.9	3988.77
186	3985.18
186.1	3981.58
186.2	3977.99
186.3	3974.4
186.4	3970.81
186.5	3967.23
186.6	3963.65
186.7	3960.08
186.8	3956.51
186.9	3952.94
187	3949.37
187.1	3945.81
187.2	3942.25
187.3	3938.7
187.4	3935.15
187.5	3931.6
187.6	3928.05
187.7	3924.51
187.8	3920.97
187.9	3917.44
188	3913.91
188.1	3910.38
188.2	3906.85
188.3	3903.33
188.4	3899.82
188.5	3896.3
188.6	3892.79
188.7	3889.28
188.8	3885.78
188.9	3882.28
189	3878.78
189.1	3875.28
189.2	3871.79
189.3	3868.31
189.4	3864.82
189.5	3861.34
189.6	3857.86
189.7	3854.39
189.8	3850.92
189.9	3847.45
190	3843.98
190.1	3840.52
190.2	3837.06
190.3	3833.61
190.4	3830.16
190.5	3826.71
190.6	3823.26
190.7	3819.82
190.8	3816.38
190.9	3812.95
191	3809.52
191.1	3806.09
191.2	3802.66
191.3	3799.24
191.4	3795.82
191.5	3792.4
191.6	3788.99
191.7	3785.58
191.8	3782.18
191.9	3778.77
192	3775.37
192.1	3771.98
192.2	3768.58
192.3	3765.19
192.4	3761.81
192.5	3758.42
192.6	3755.04
192.7	3751.67
192.8	3748.29
192.9	3744.92
193	3741.55
193.1	3738.19
193.2	3734.83
193.3	3731.47
193.4	3728.12
193.5	3724.77
193.6	3721.42
193.7	3718.07
193.8	3714.73
193.9	3711.39
194	3708.06
194.1	3704.72
194.2	3701.39
194.3	3698.07
194.4	3694.74
194.5	3691.42
194.6	3688.11
194.7	3684.79
194.8	3681.48
194.9	3678.18
195	3674.87
195.1	3671.57
195.2	3668.27
195.3	3664.98
195.4	3661.69
195.5	3658.4
195.6	3655.11
195.7	3651.83
195.8	3648.55
195.9	3645.27
196	3642
196.1	3638.73
196.2	3635.47
196.3	3632.2
196.4	3628.94
196.5	3625.68
196.6	3622.43
196.7	3619.18
196.8	3615.93
196.9	3612.68
197	3609.44
197.1	3606.2
197.2	3602.97
197.3	3599.73
197.4	3596.5
197.5	3593.28
197.6	3590.05
197.7	3586.83
197.8	3583.61
197.9	3580.4
198	3577.19
198.1	3573.98
198.2	3570.77
198.3	3567.57
198.4	3564.37
198.5	3561.18
198.6	3557.98
198.7	3554.79
198.8	3551.61
198.9	3548.42
199	3545.24
199.1	3542.06
[truncated: 1,509 more rows]

## Sheet: Profiles
Vertical weighting
distance from sensor r [m]
2
Penetration depth [cm]
87.8273
	depth [cm]	weight
	10	0.796348
	25	0.565922
	50	0.320268
	75	0.181247
	100	0.102572
	200	0.0105209
	300	0.00107915
